# Supplementary material for: Tandem halogenation/Michael-initiated ring-closing reaction of α,β-unsaturated nitriles and activated methylene compounds: one-pot diastereoselective synthesis of functionalized cyclopropanes
Source: Royal Society of Chemistry journal article supplement (doi:10.1039/c4ob00087k), 2014-01-01

**Tandem Halogenation/Michael-initiated Ring-closing Reaction  
of  $\alpha,\beta$ -Unsaturated Nitriles and Activated Methylene  
Compounds: One-pot Diastereoselective Synthesis of  
Functionalized Cyclopropanes**

Xiaoqing Xin,<sup>a</sup> Qian Zhang,<sup>a</sup> Yongjiu Liang,\*<sup>a</sup> Rui Zhang,<sup>a,b</sup> and Dewen Dong\*<sup>a,b</sup>

<sup>a</sup> Changchun Institute of Applied Chemistry, Chinese Academy of Sciences, Changchun,  
130022, China

<sup>b</sup> Changzhou Institute of Energy Storage Materials & Devices, Changzhou, 213000, P. R.  
China

E-mail: [dwdong@ciac.ac.cn](mailto:dwdong@ciac.ac.cn) (D. Dong), [yjliang@ciac.ac.cn](mailto:yjliang@ciac.ac.cn) (Y. Liang)

**Electronic Supplementary Information**

Copies of NMR spectra for compounds **3-7**.....S2-S31

## Copies of NMR spectra for compounds 3-7

### 3aa

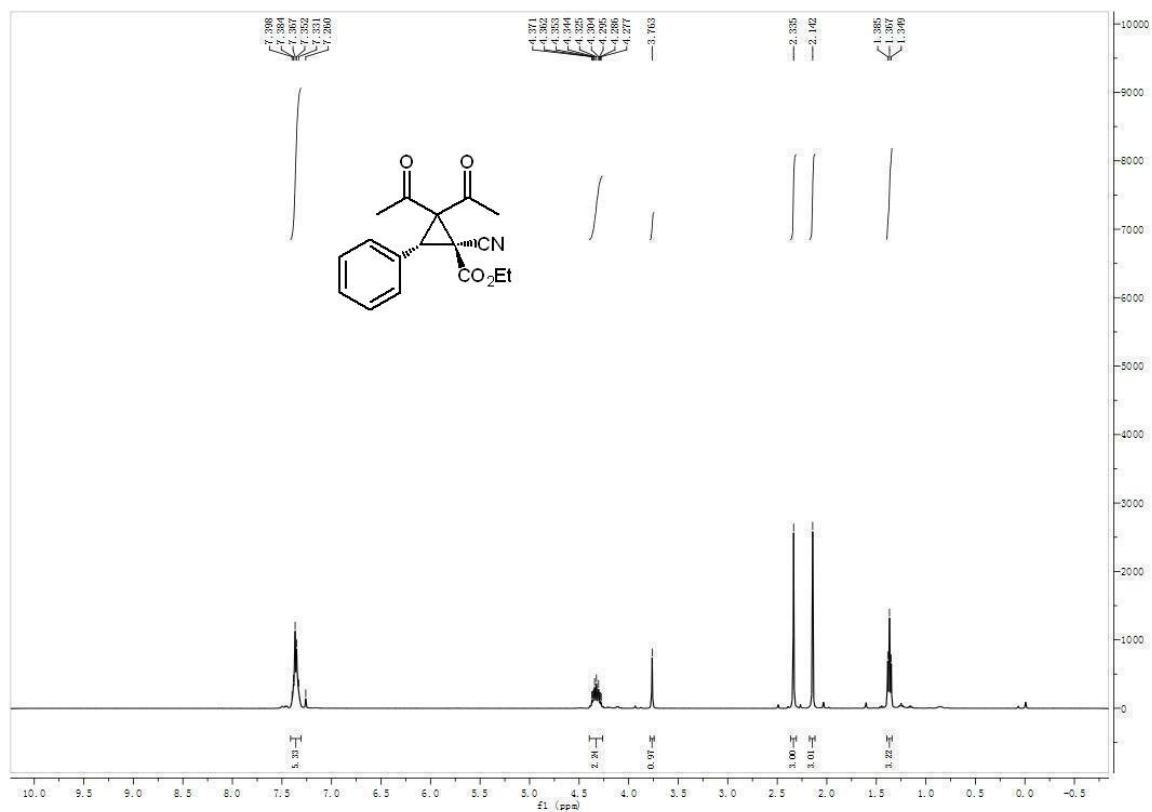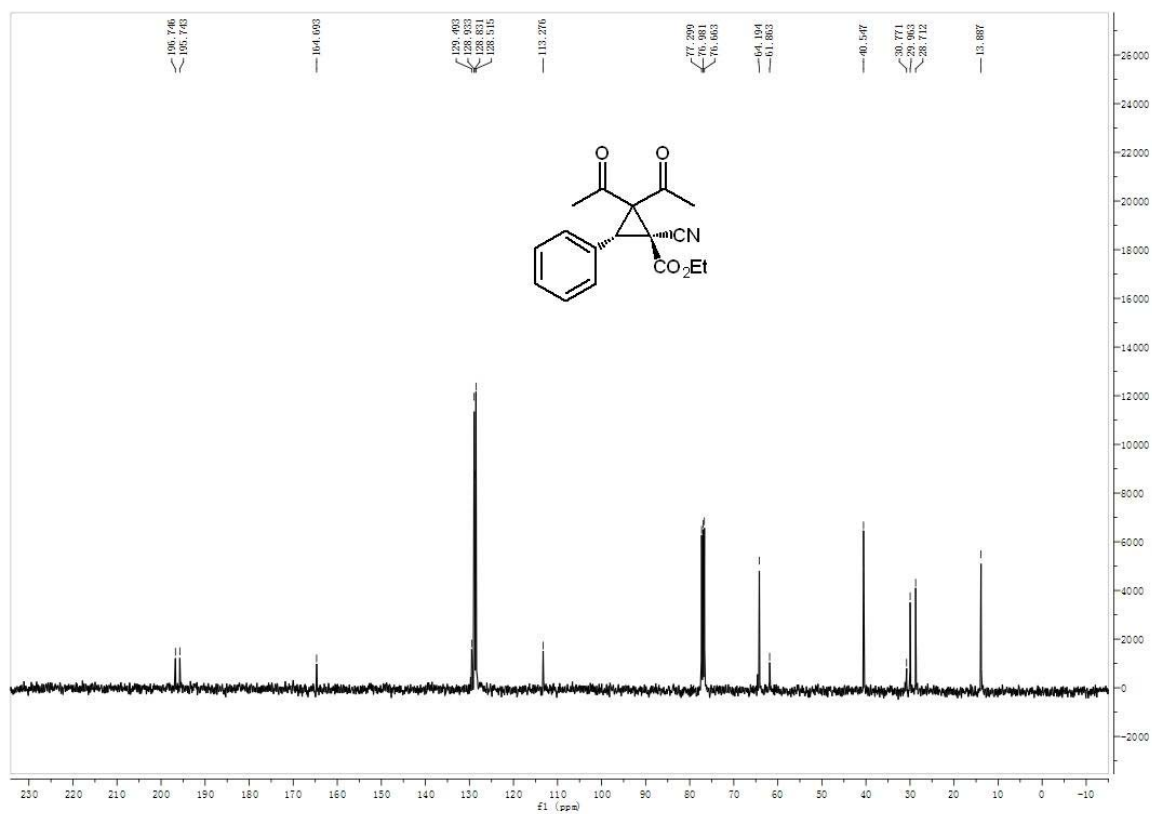

# 3ba

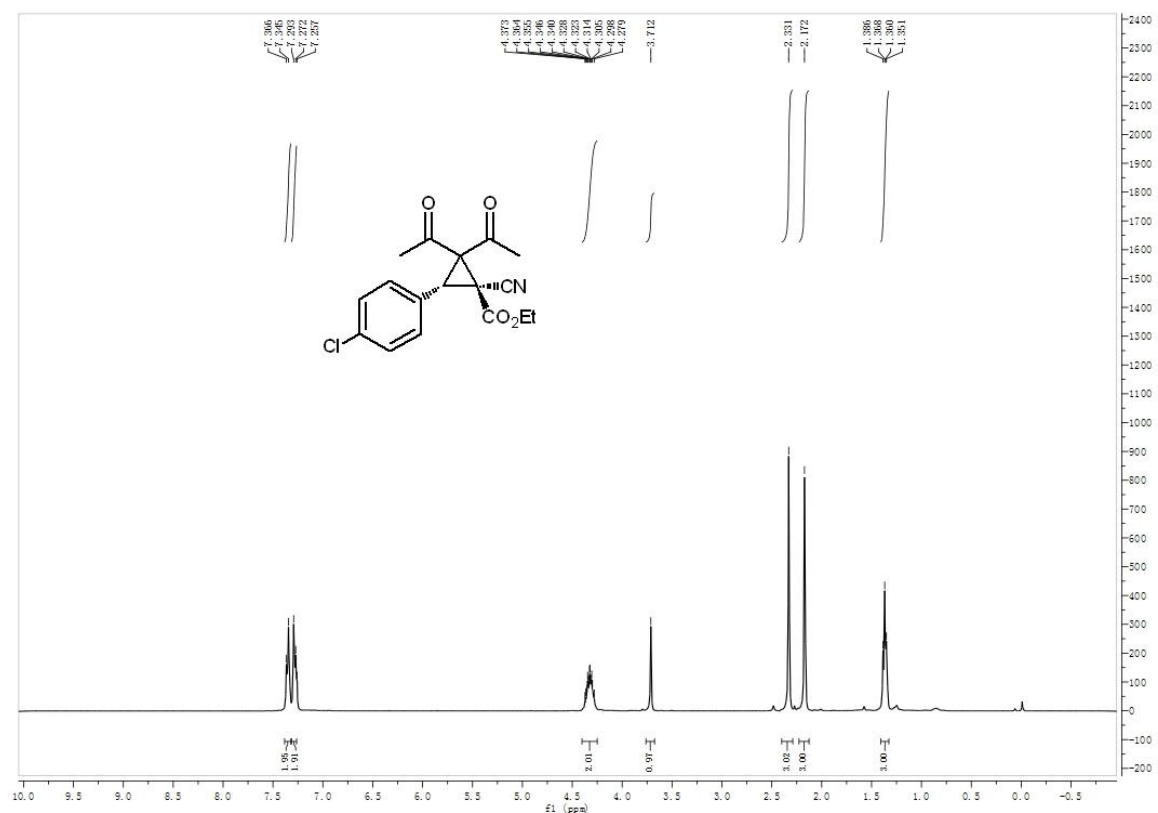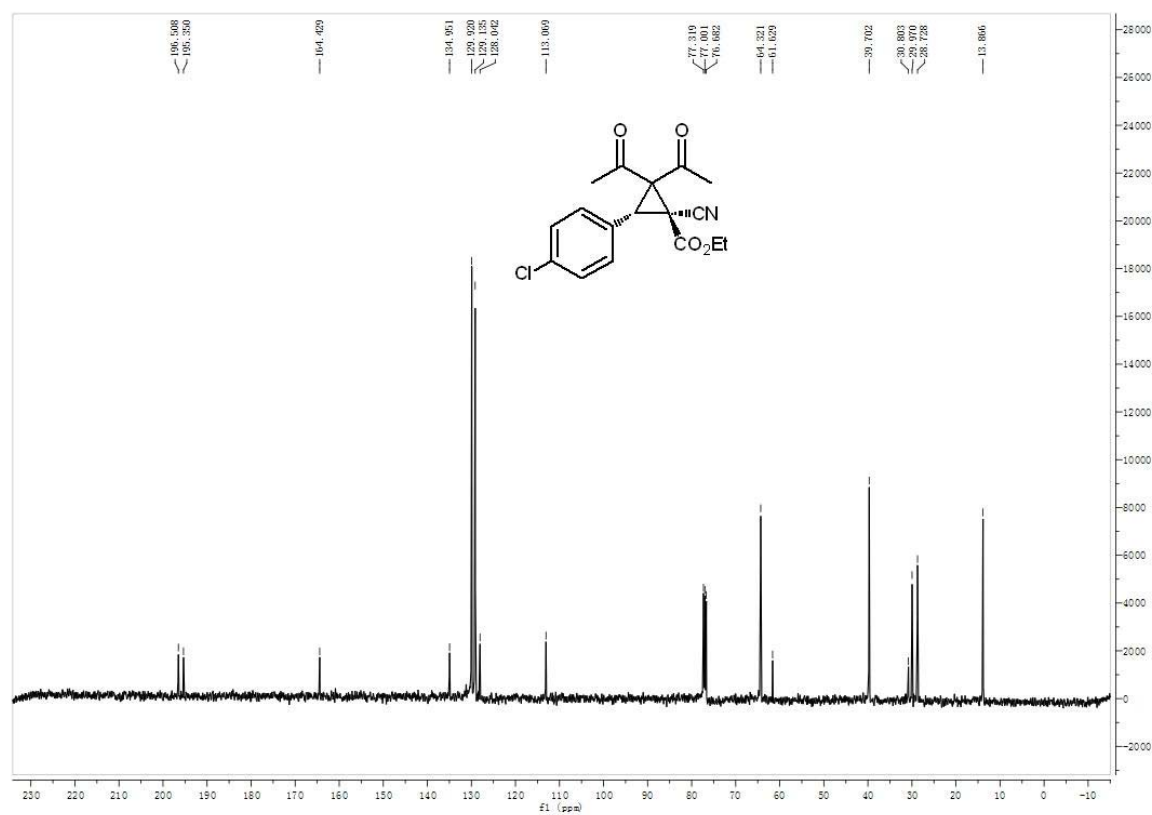

3ca

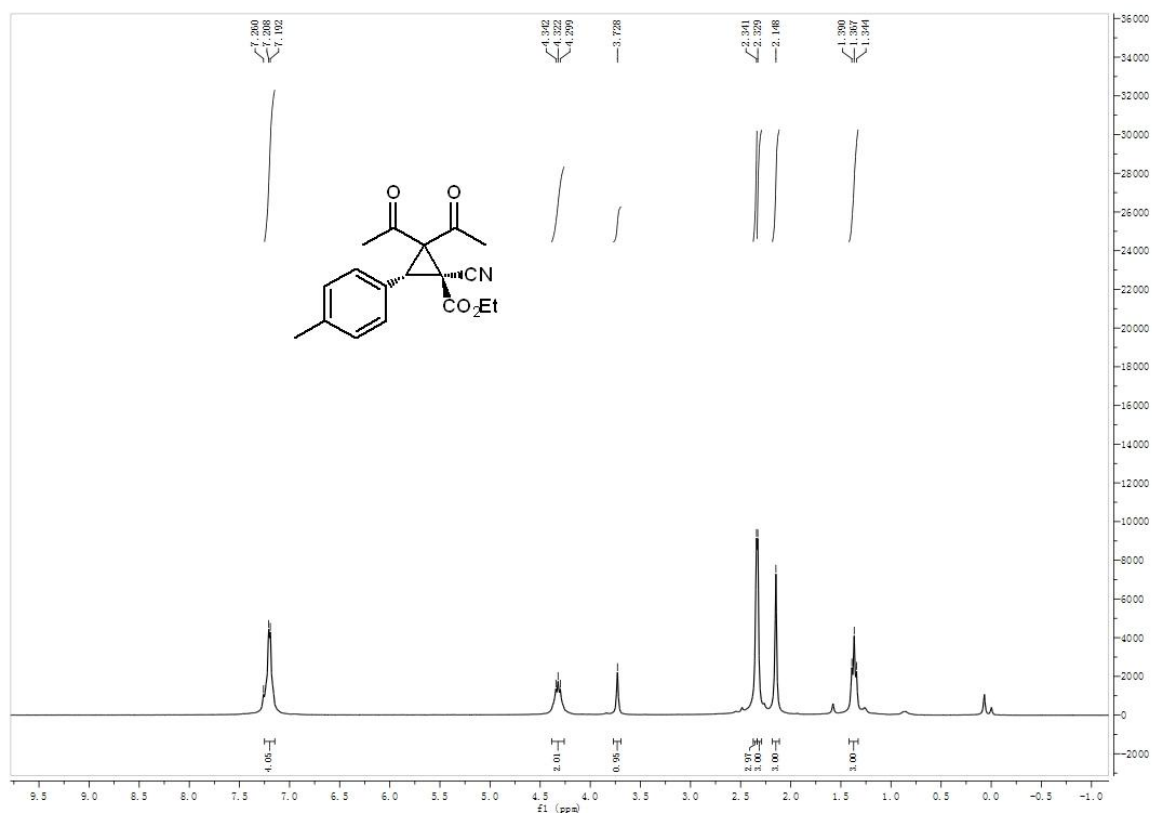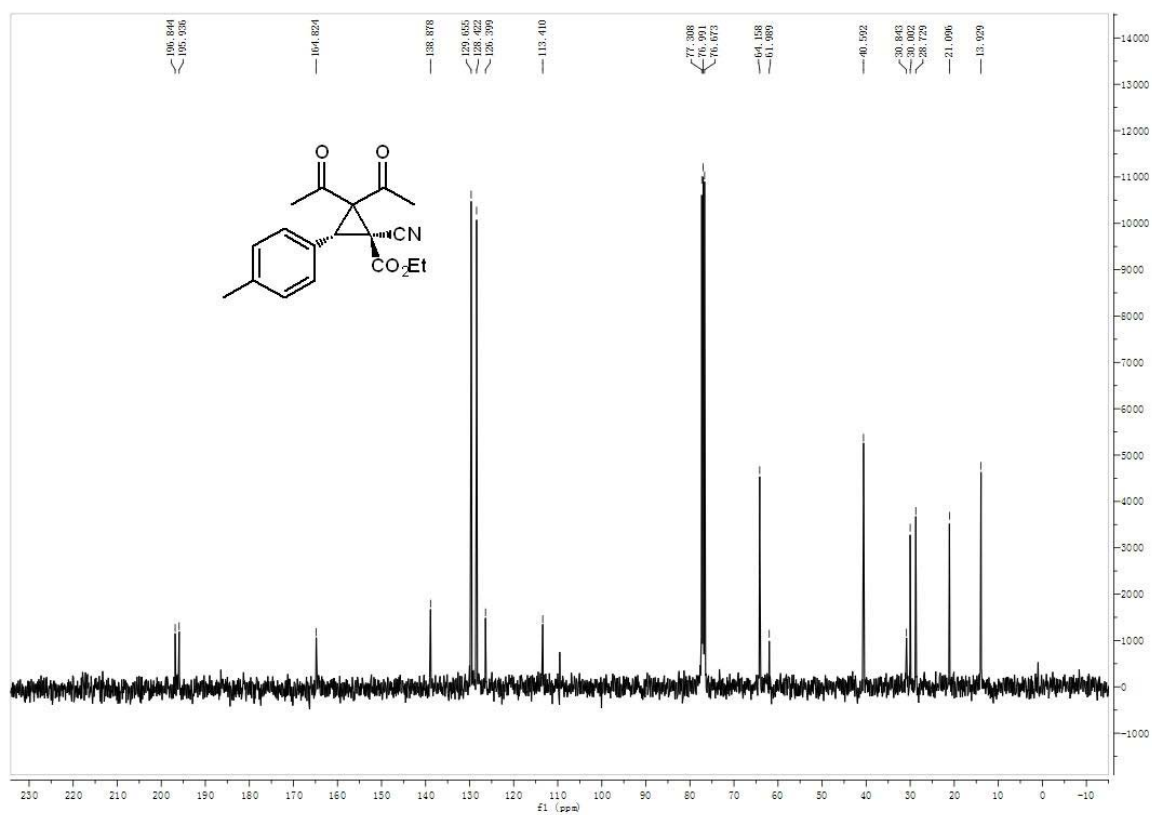

3da

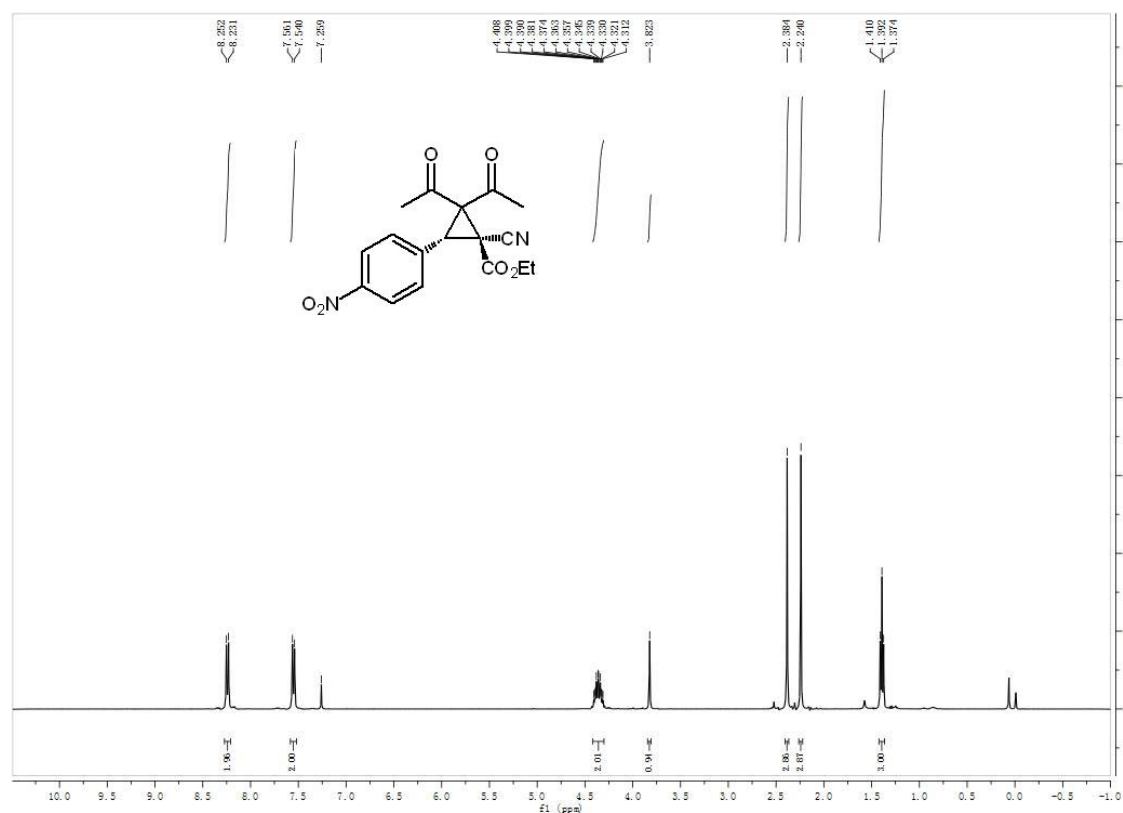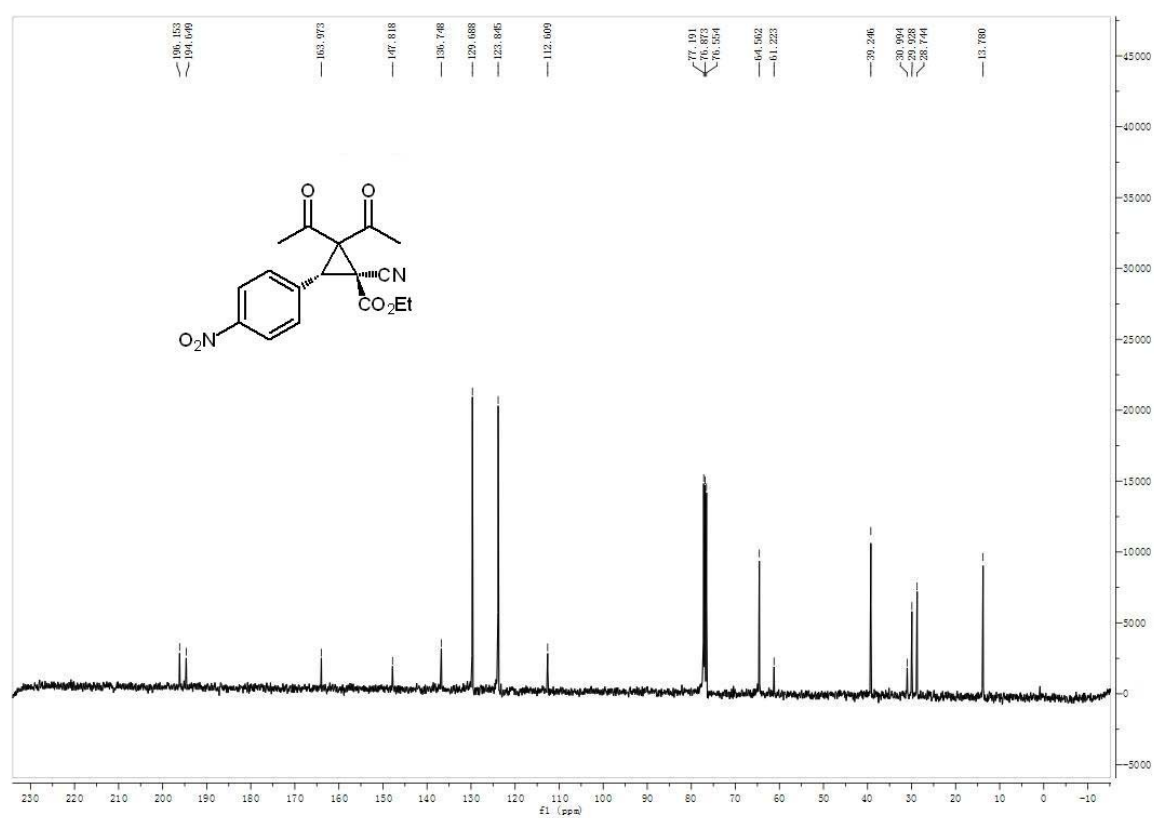

3ea

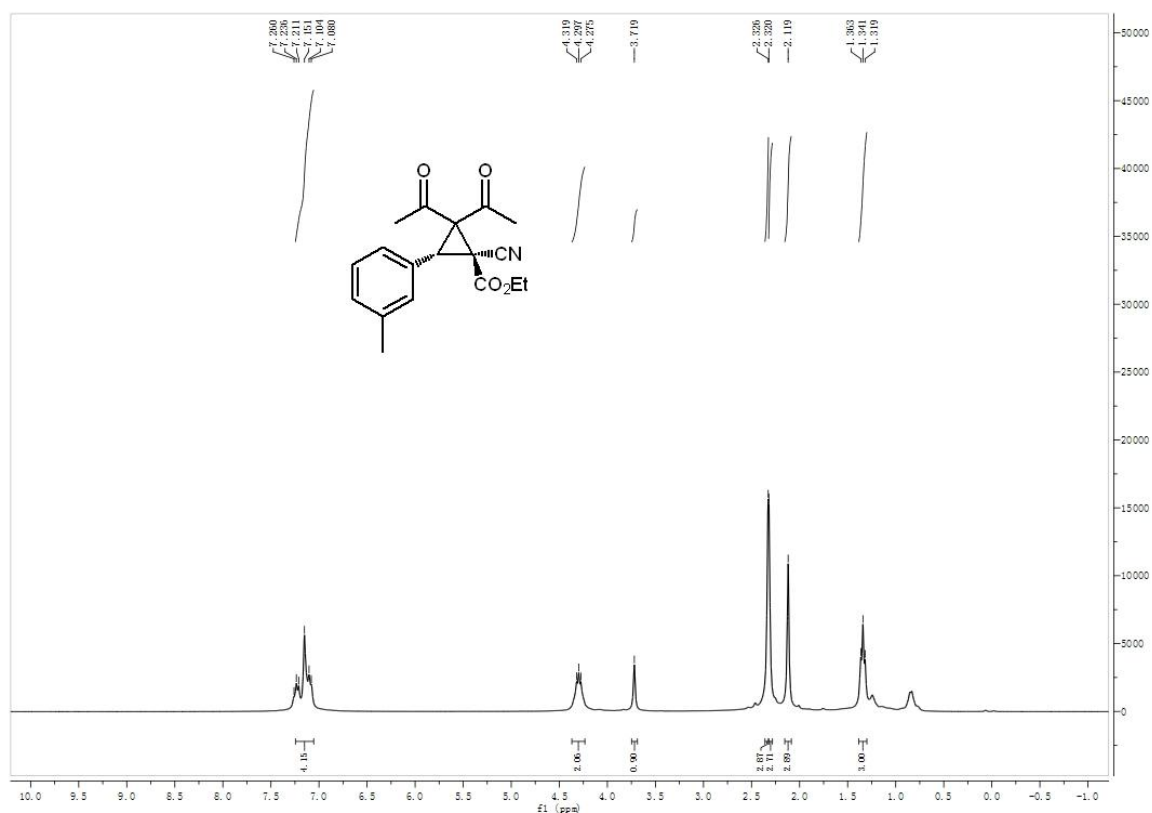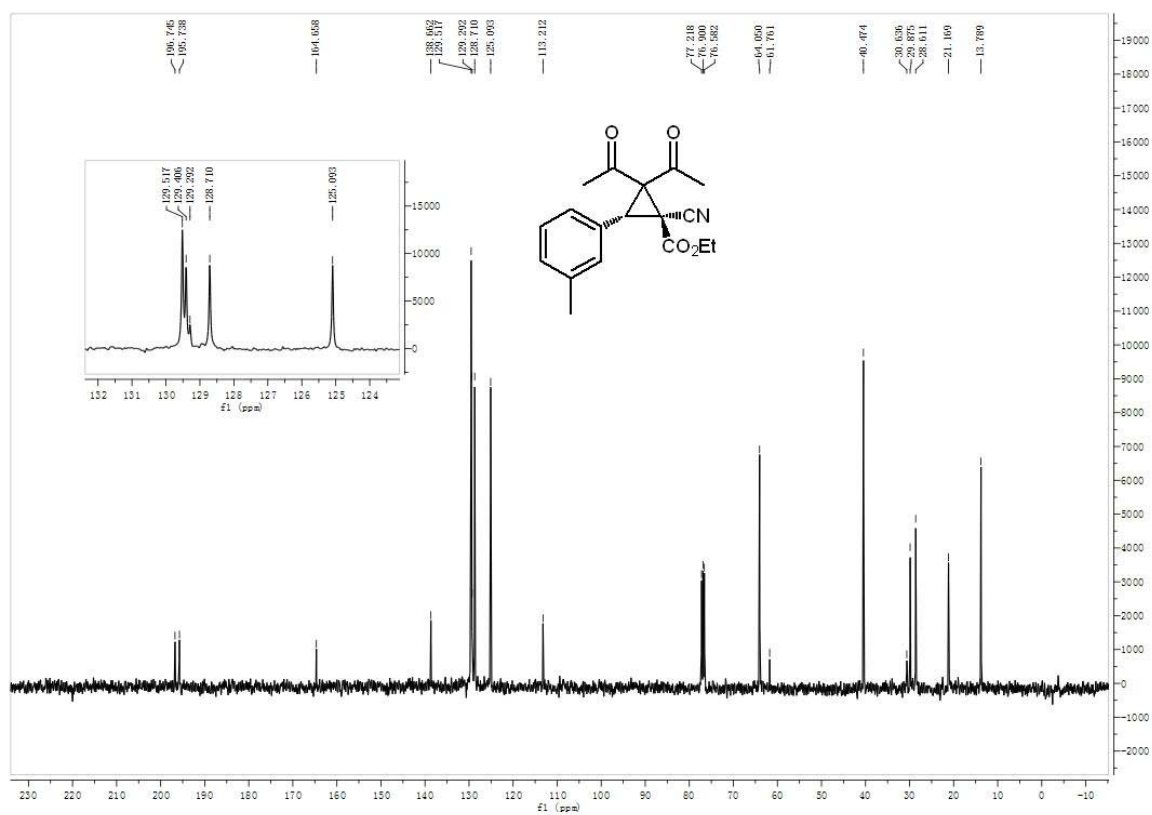

3fa

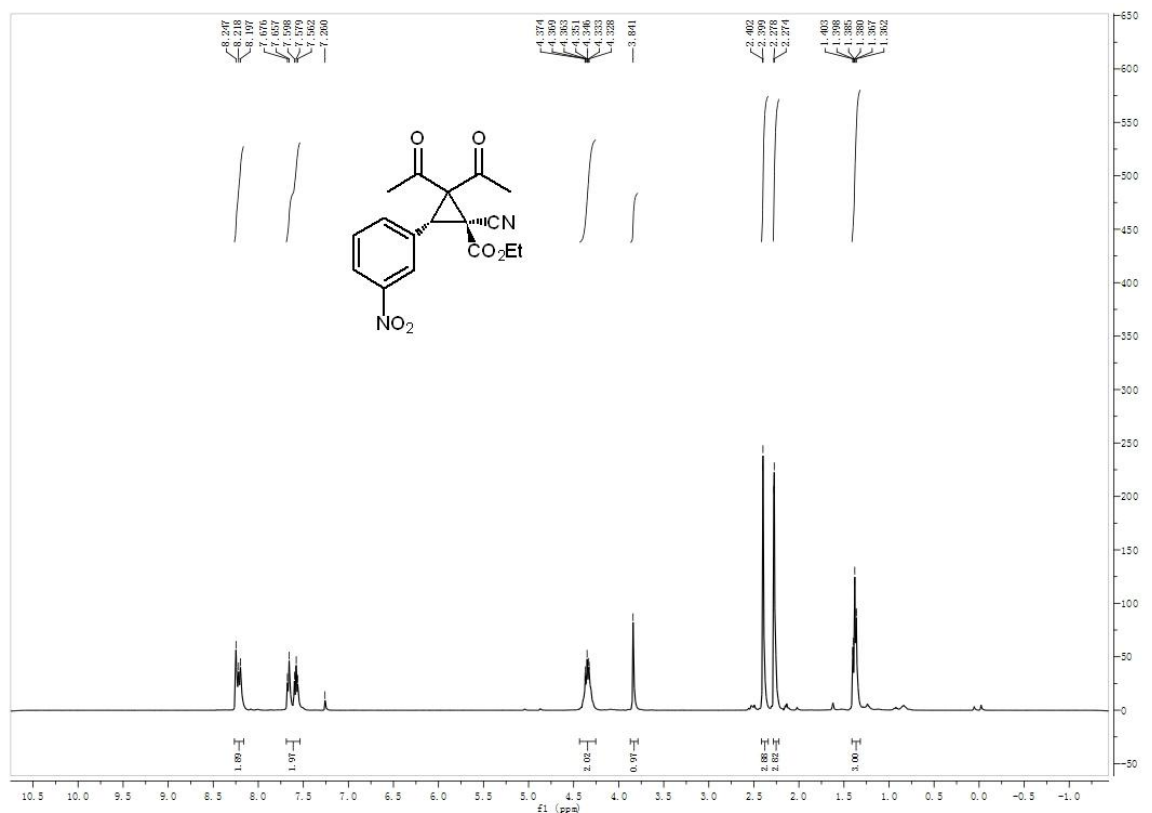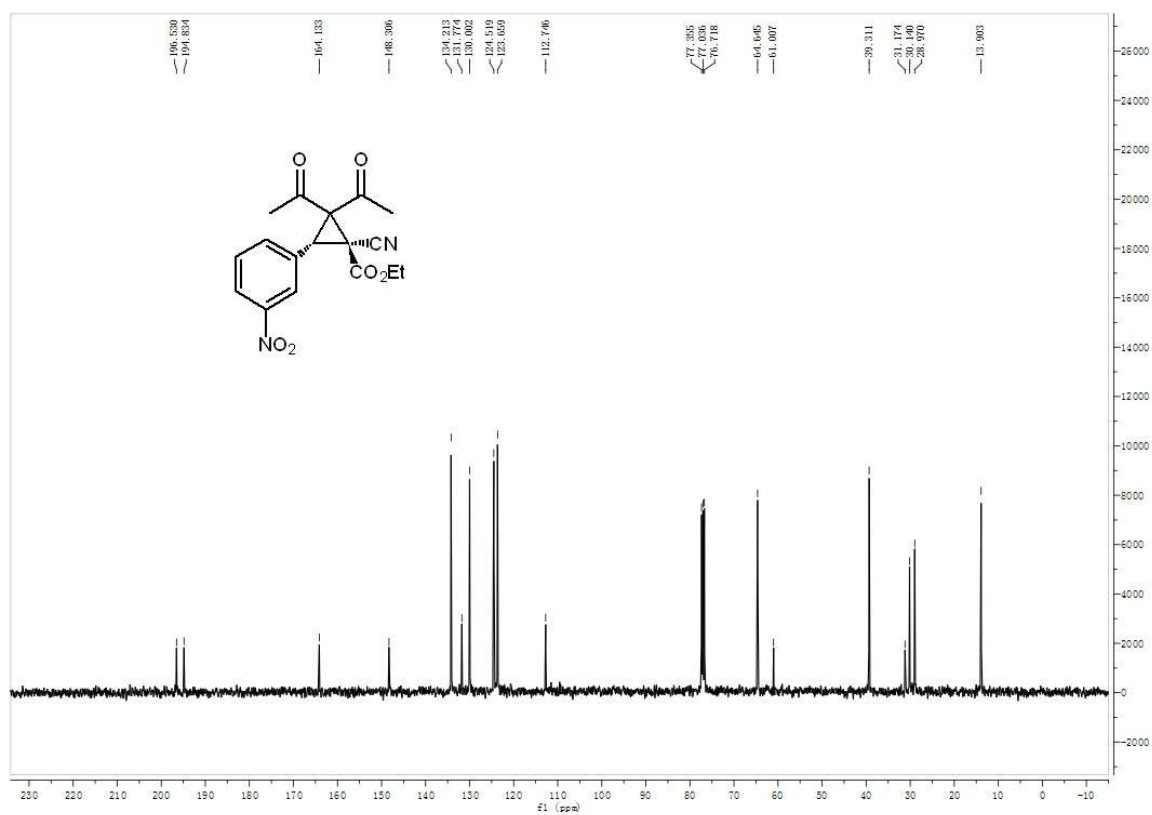

Chemical structure: CC(=O)C1(C(=O)C)C(C#N)C1C2=CC=CC=C2Cl

<sup>1</sup>H NMR spectrum (CDCl<sub>3</sub>) data:

| Chemical Shift (ppm)                     | Integration |
|------------------------------------------|-------------|
| 7.515, 7.503, 7.494, 7.319, 7.308, 7.286 | 4.19        |
| 4.352, 4.330, 4.307                      | 2.27        |
| 3.859                                    | 1.01        |
| 2.547, 2.356                             | 2.82, 2.89  |
| 1.387, 1.365, 1.342                      | 3.00        |

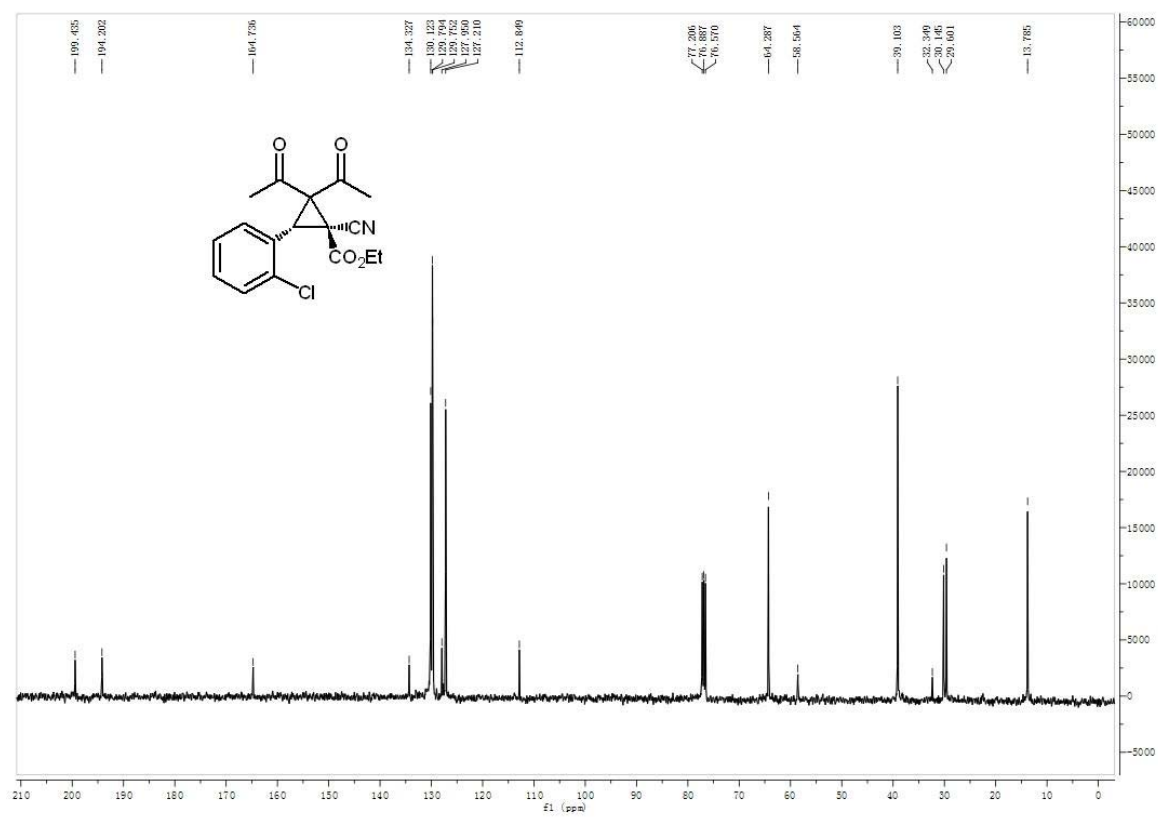



3ha

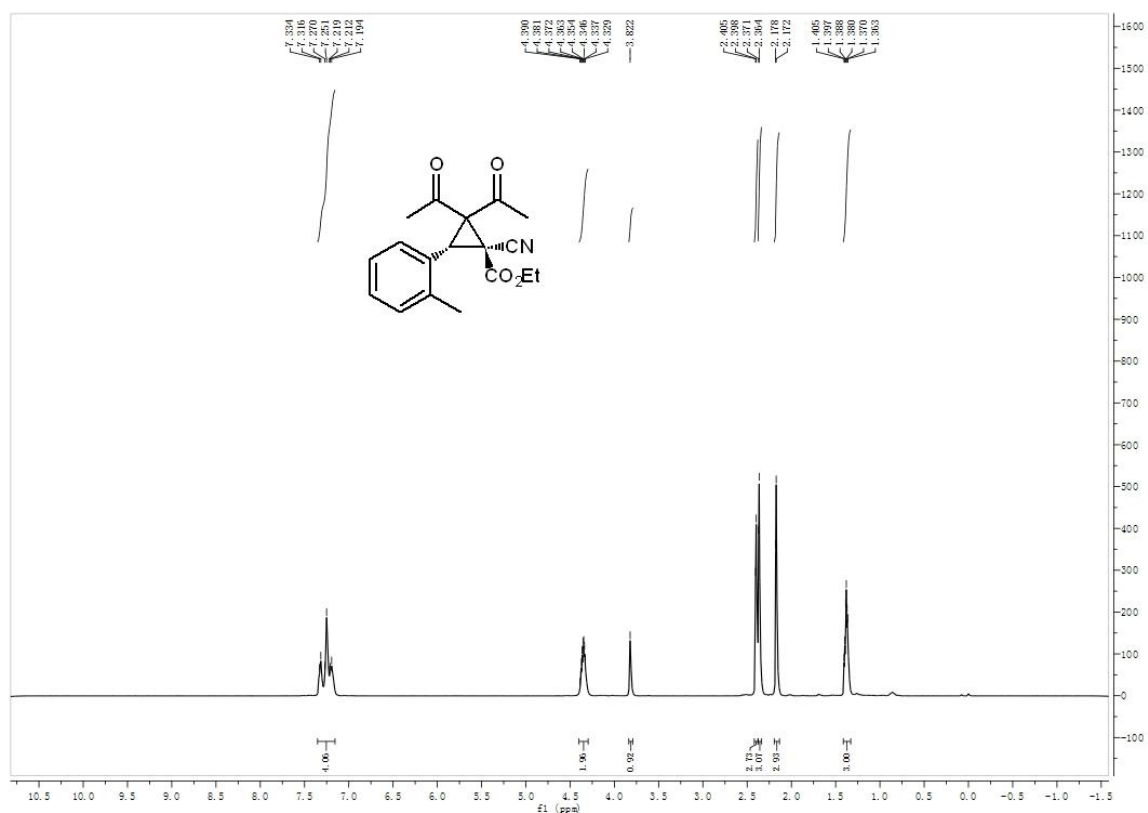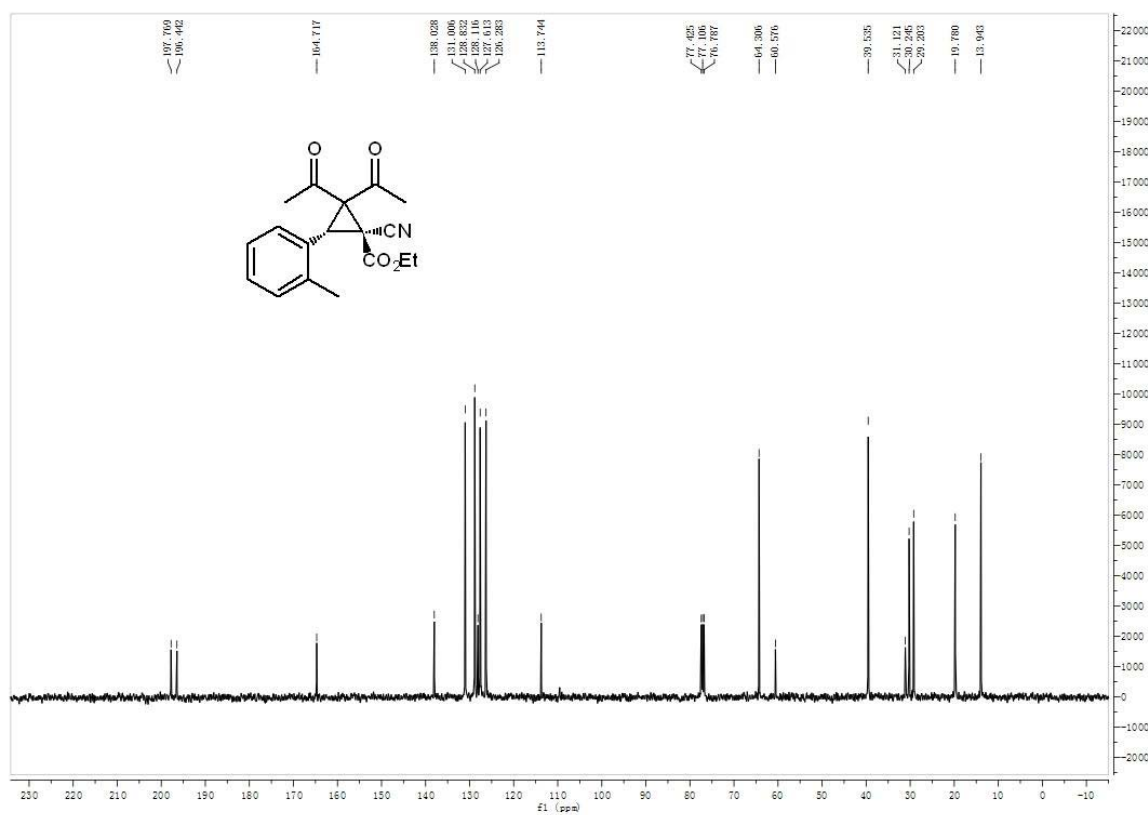

3ia

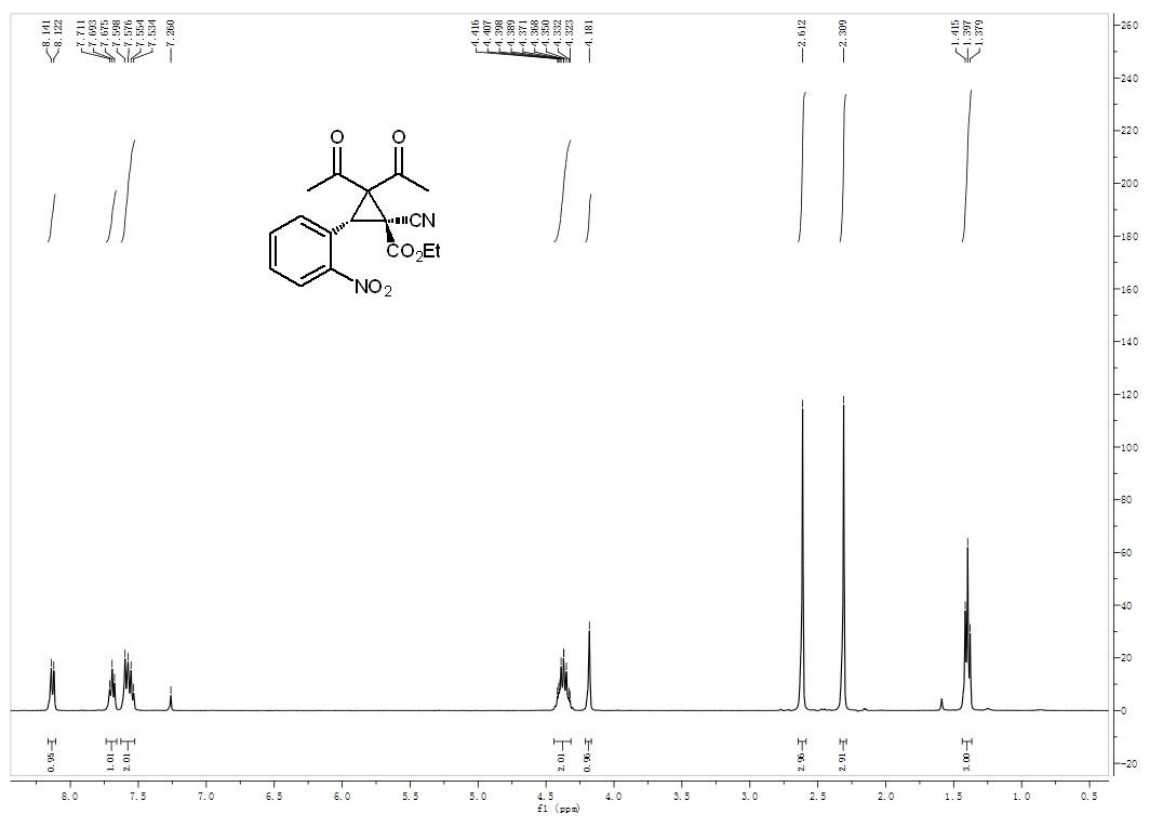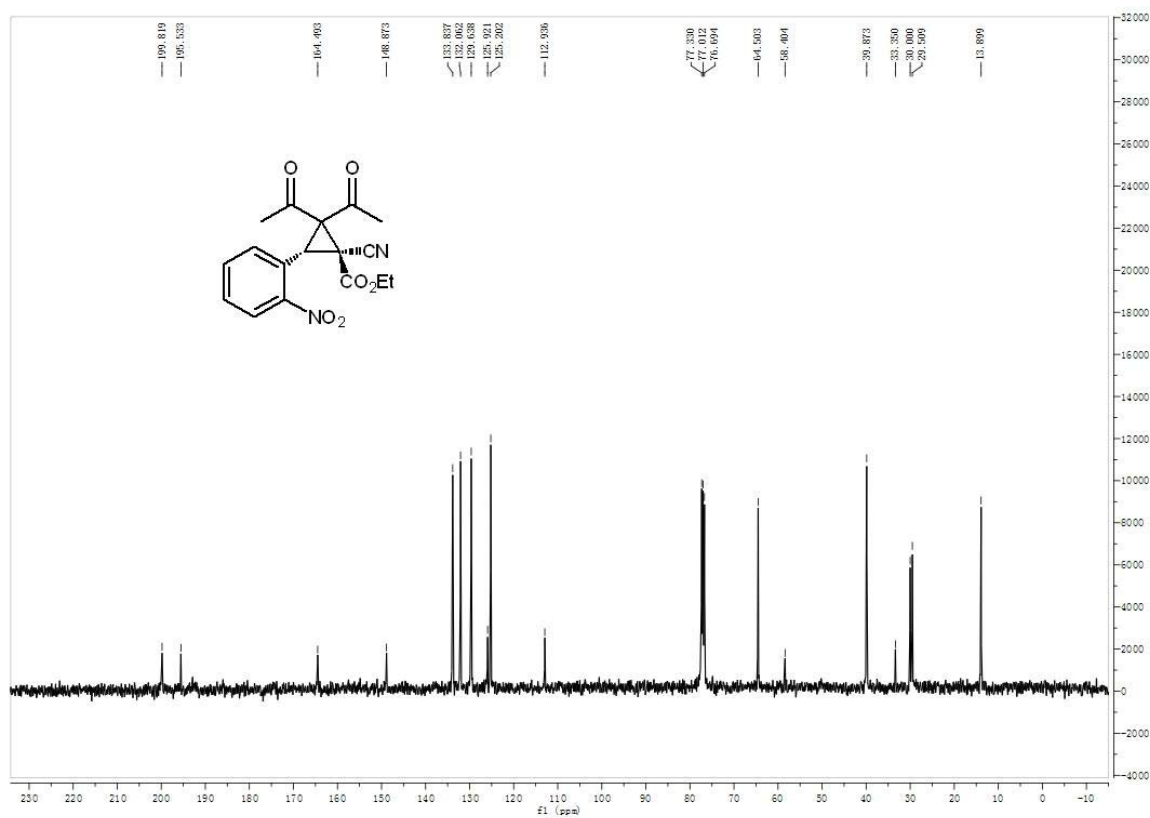

3ja

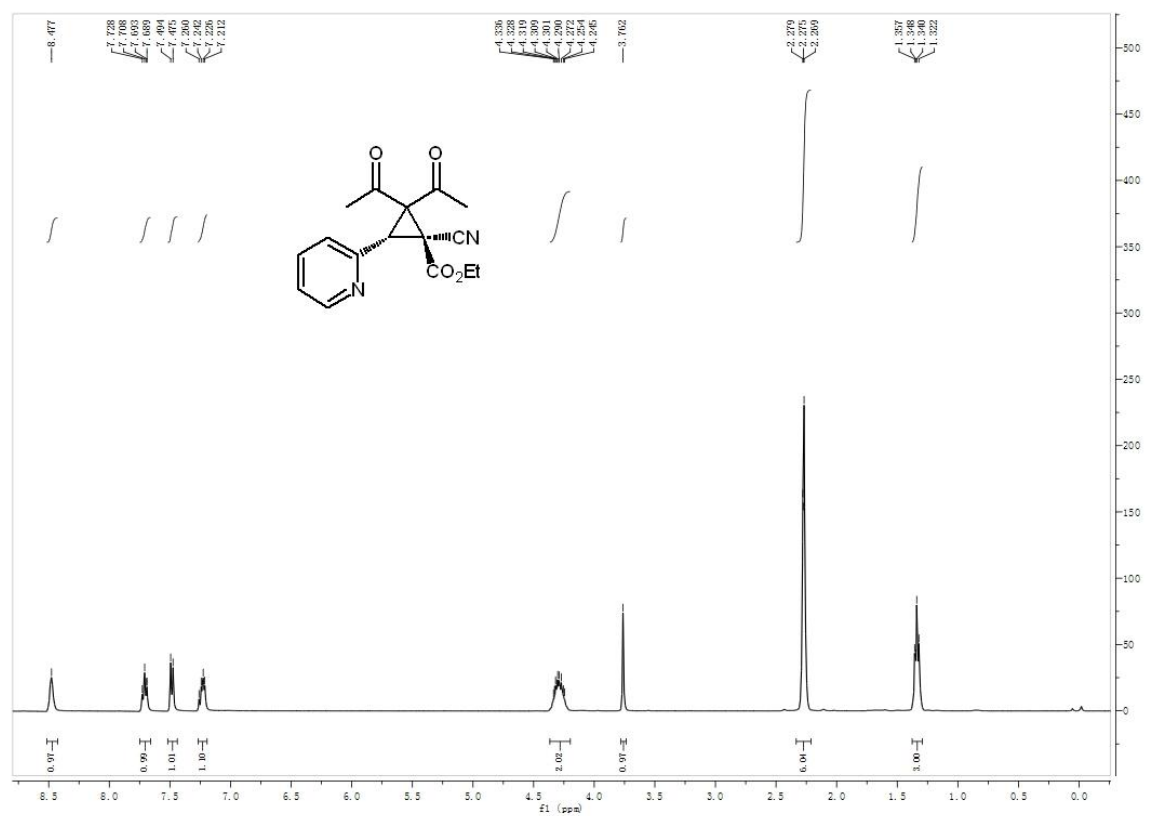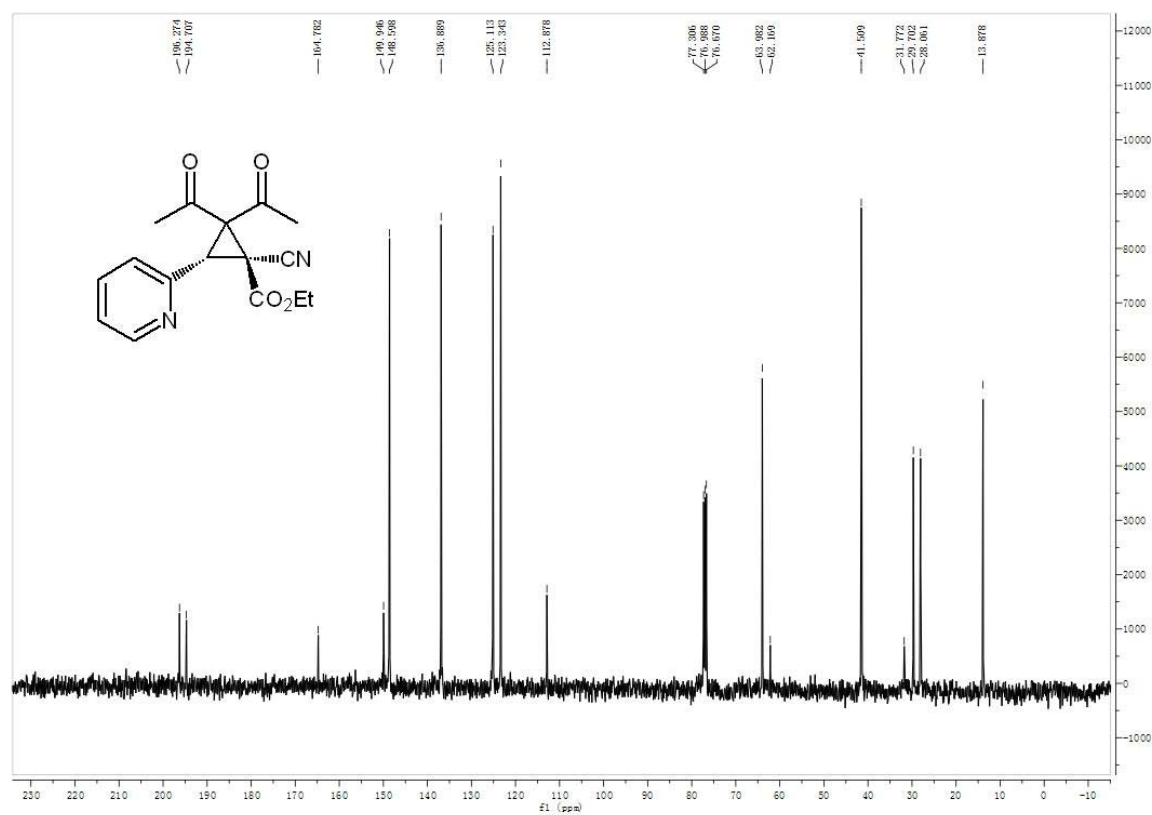

3ka

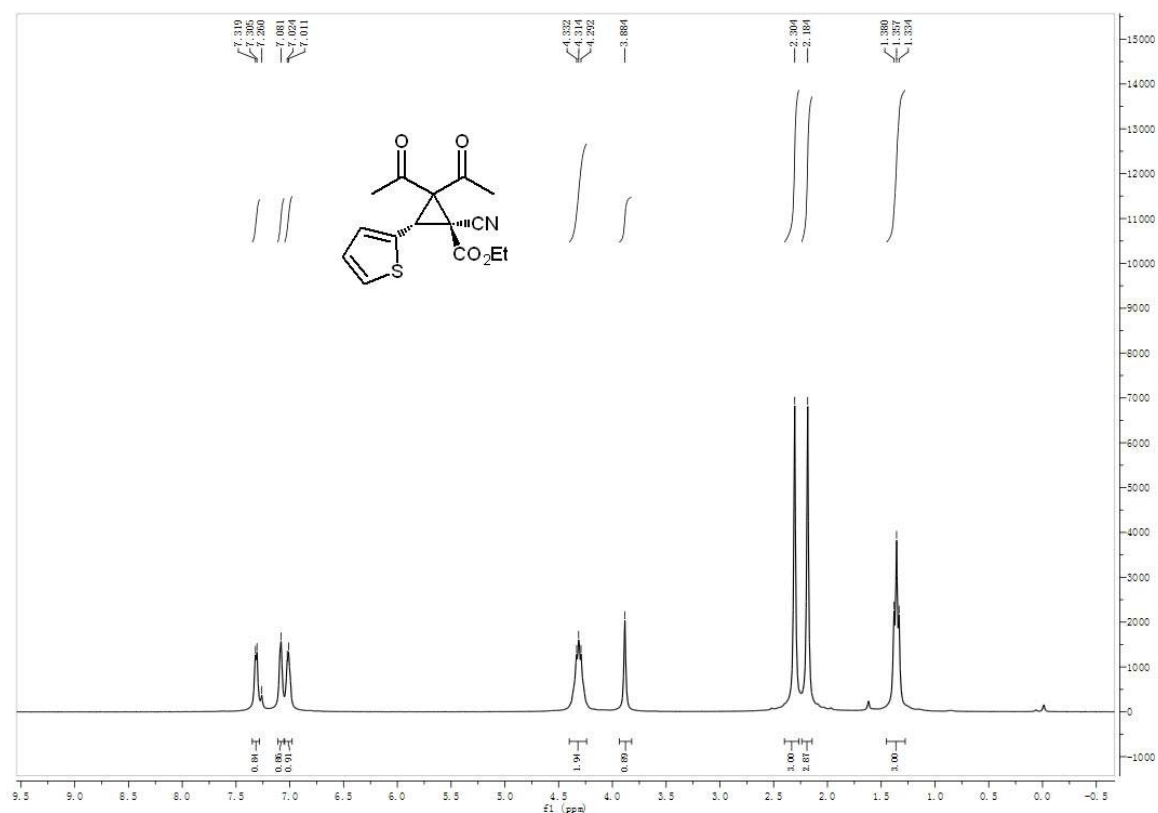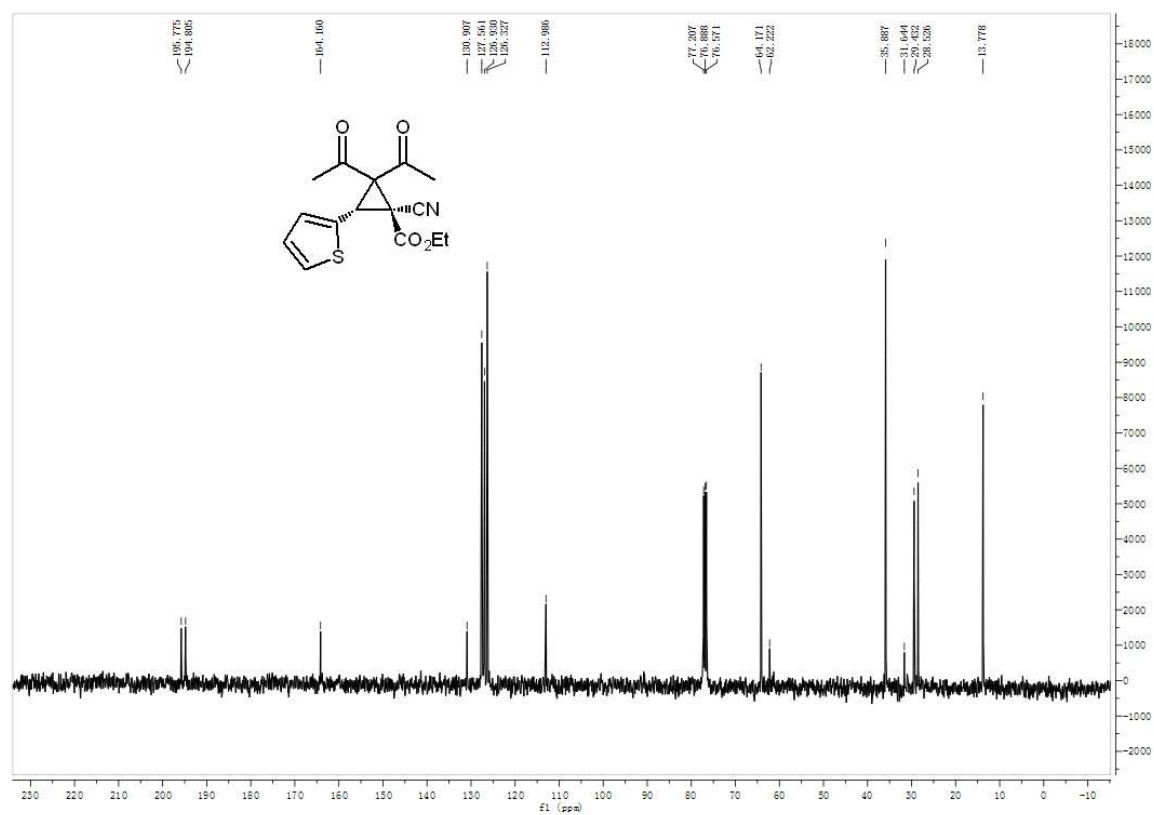

3ab

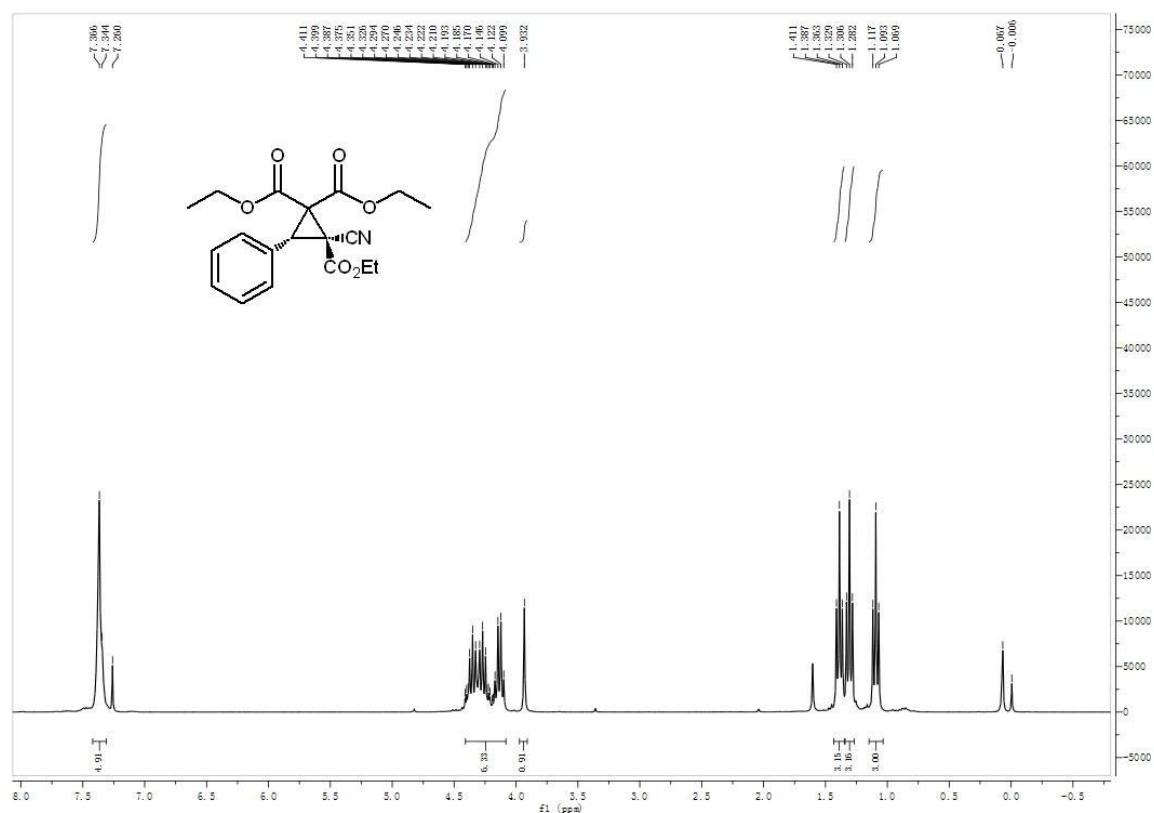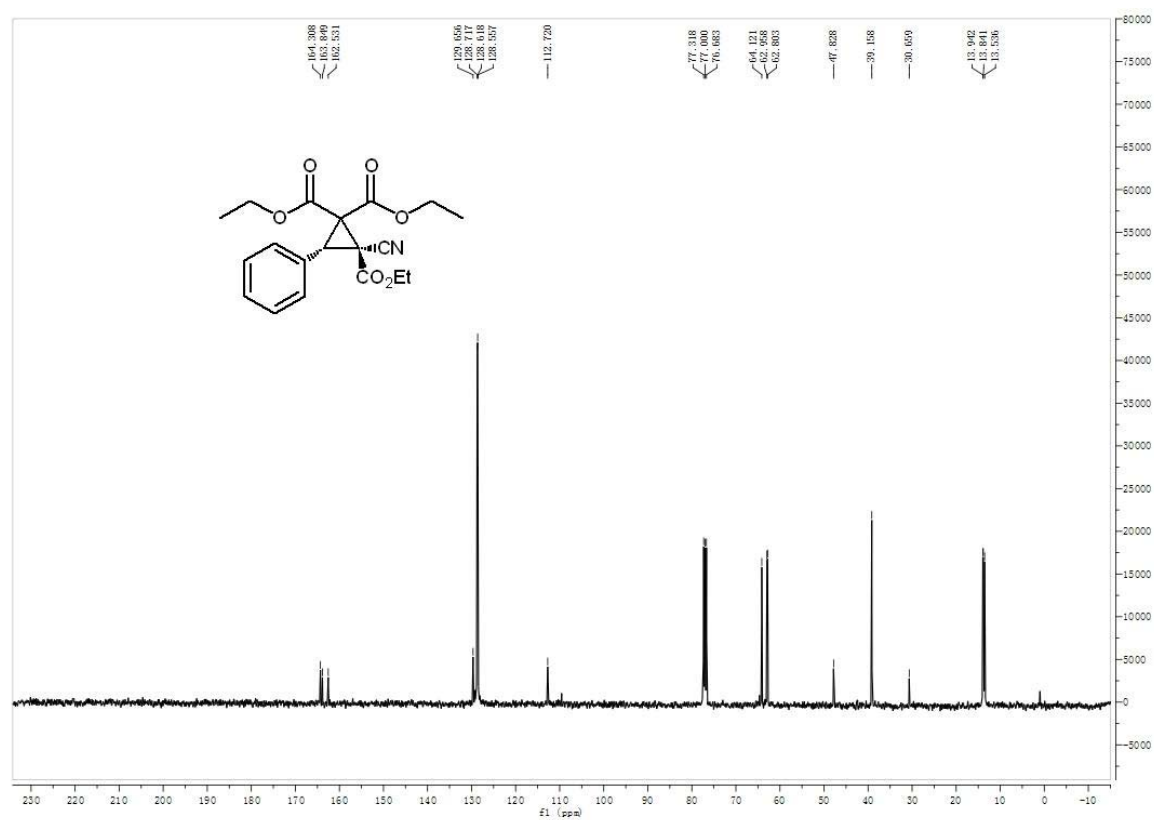

3ac

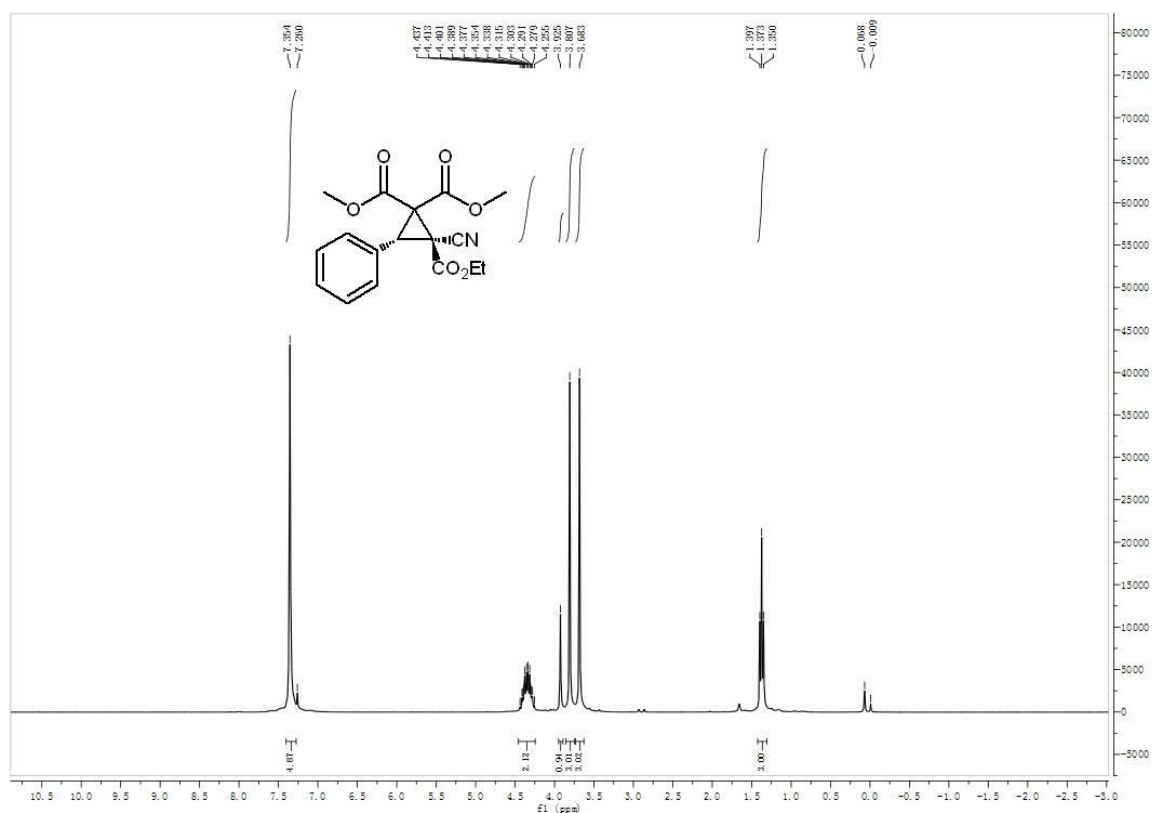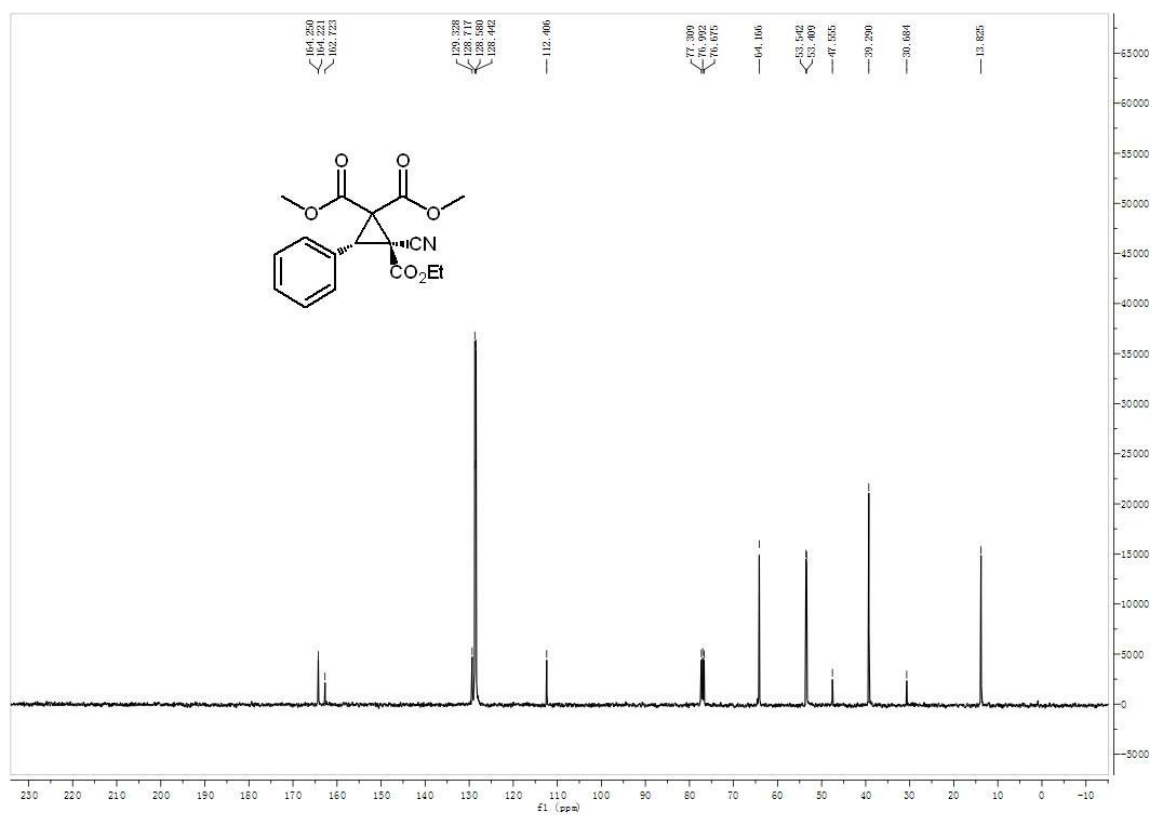

31b

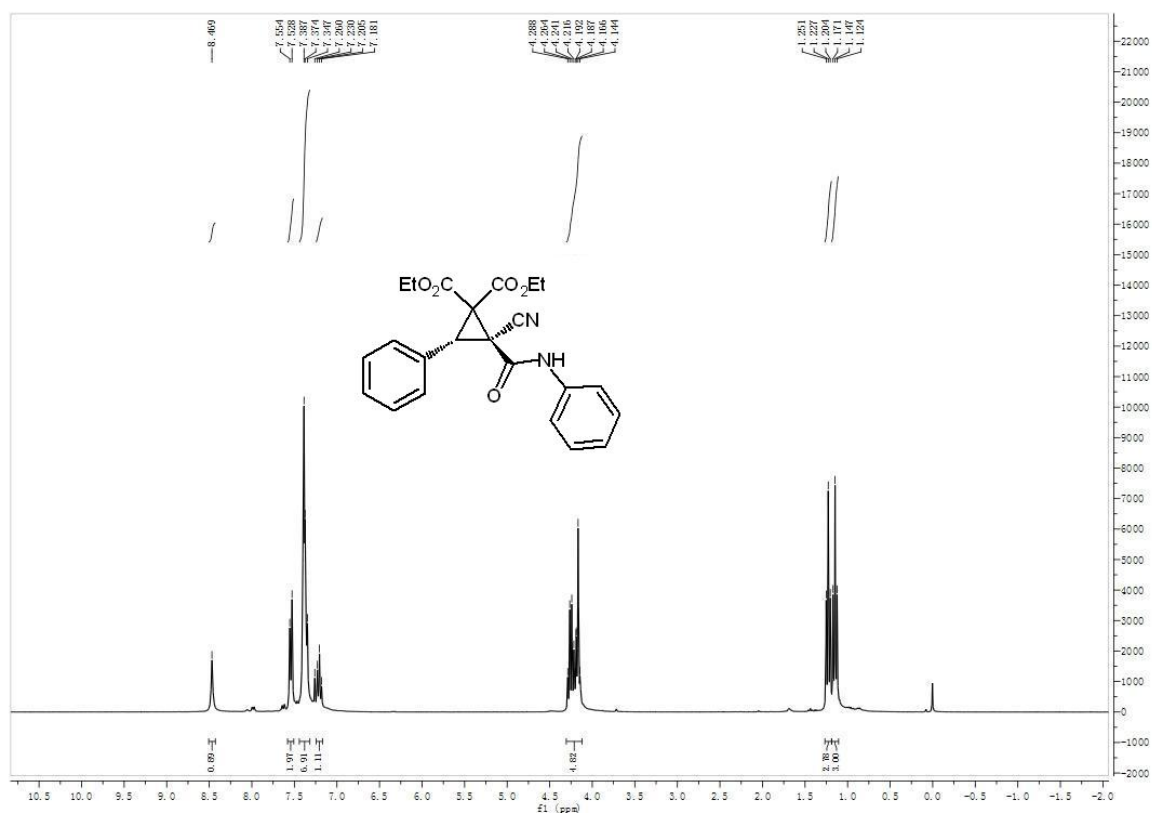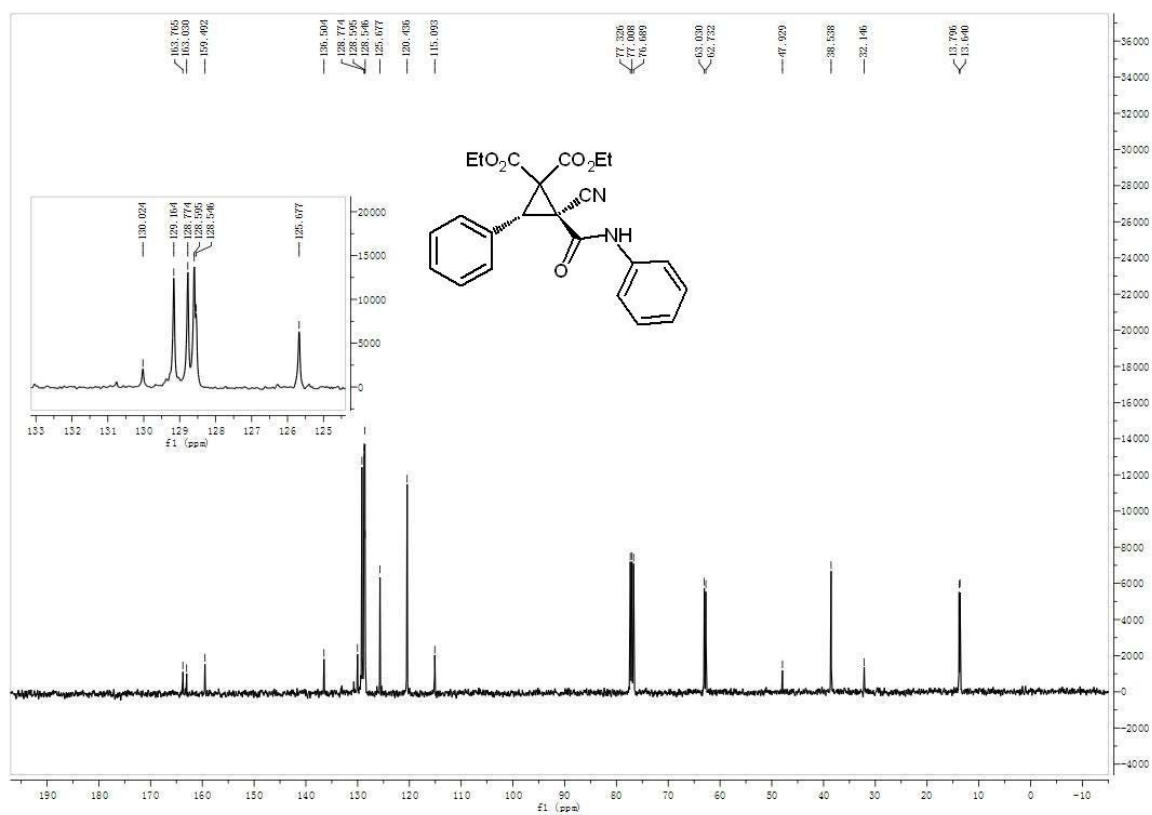

3mb

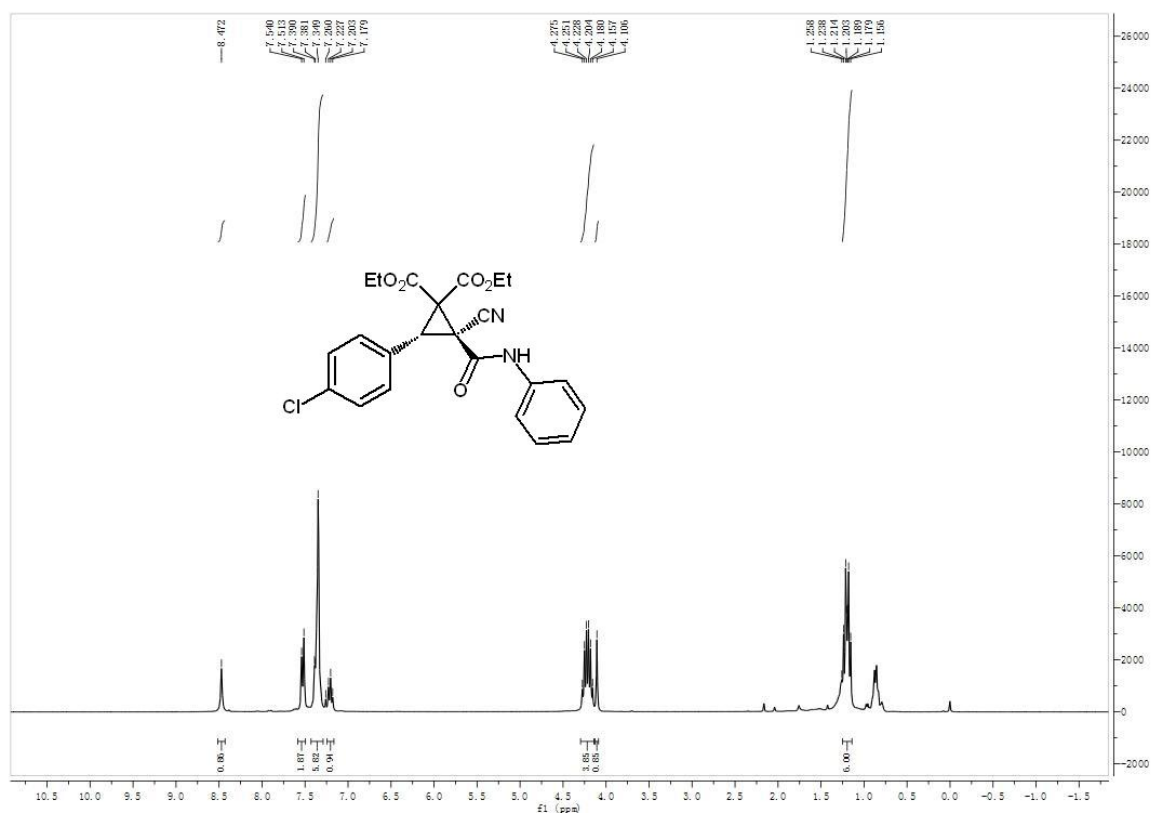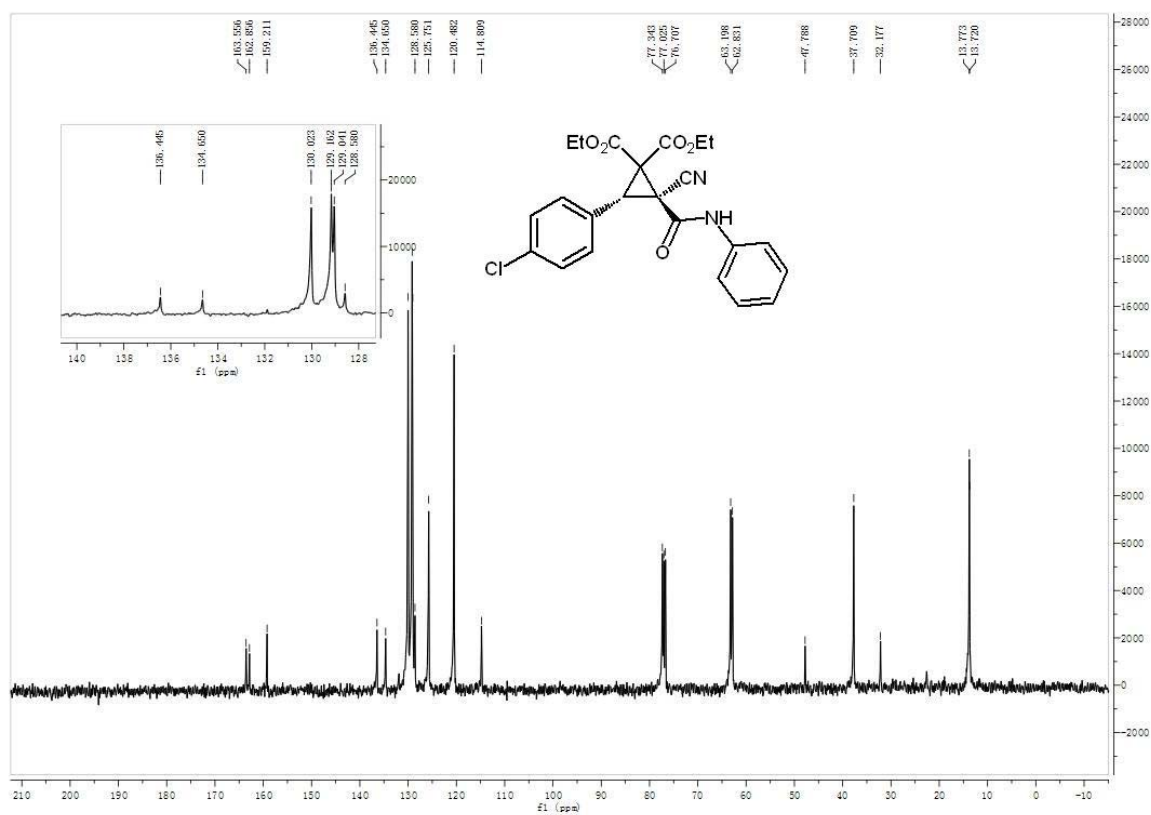



4lc

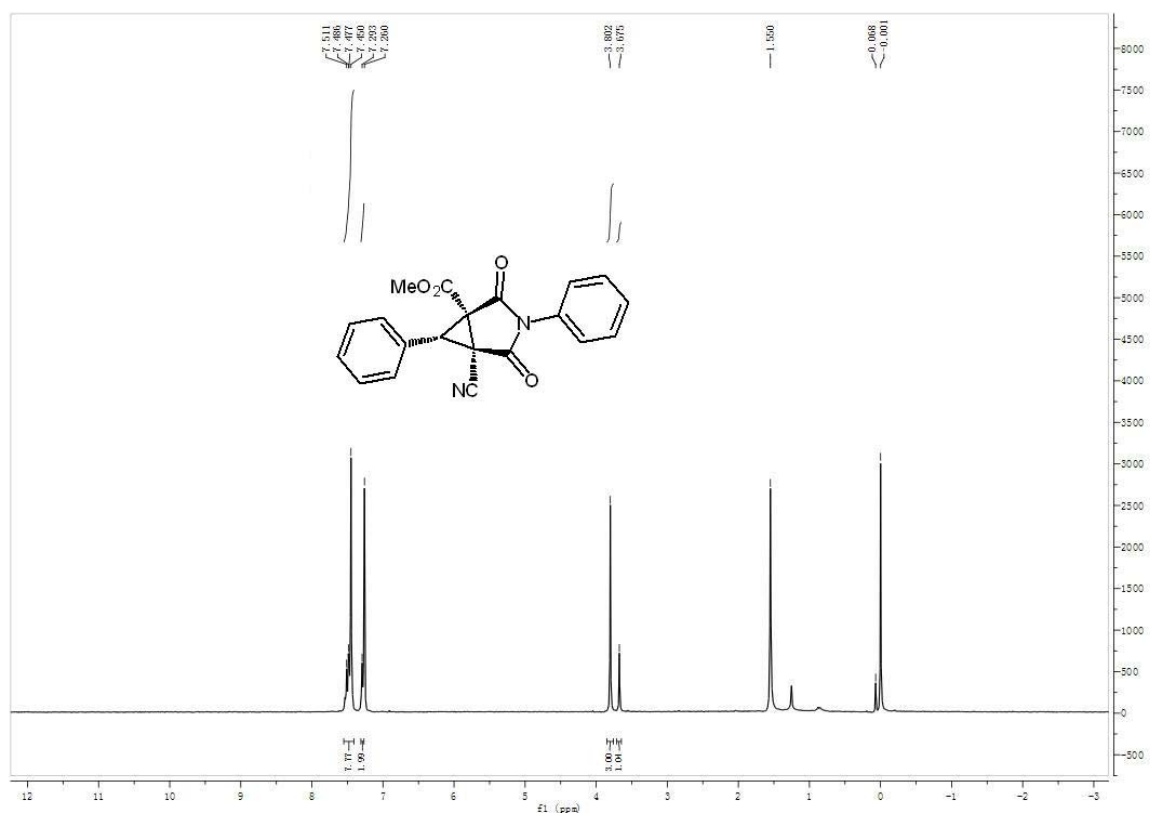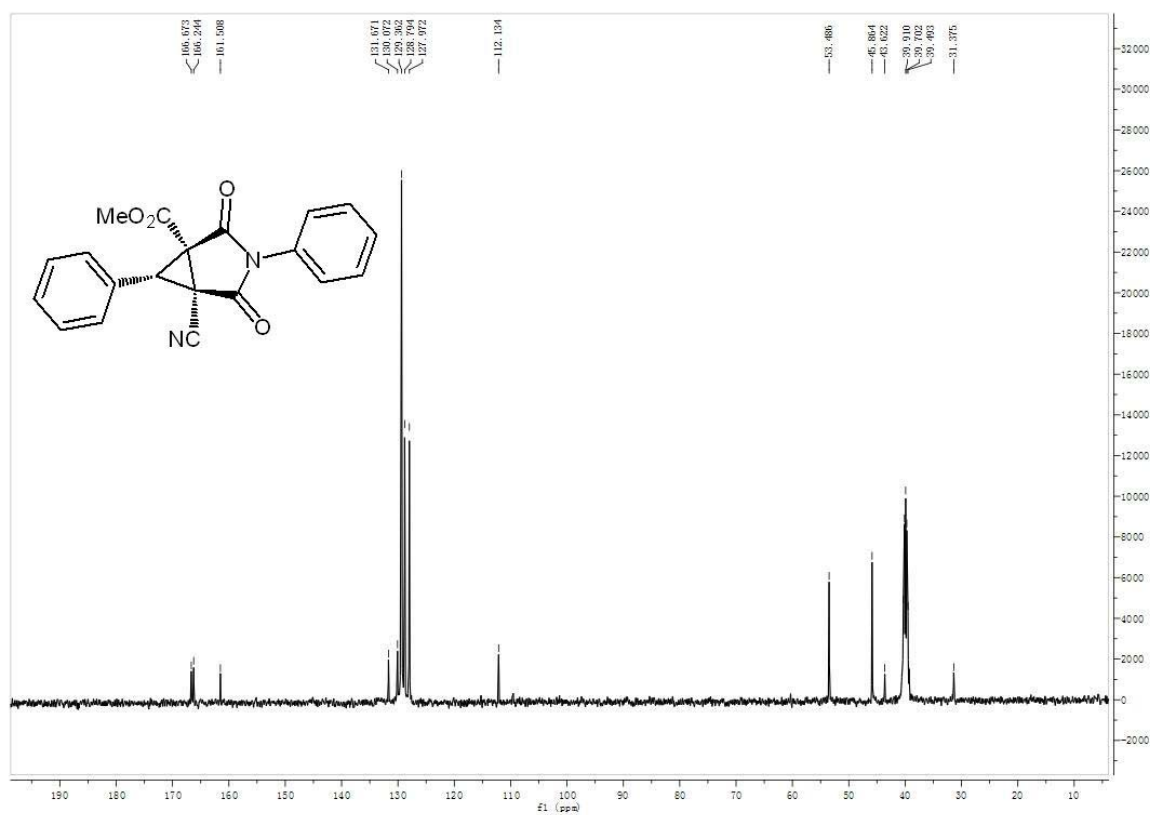

4mc

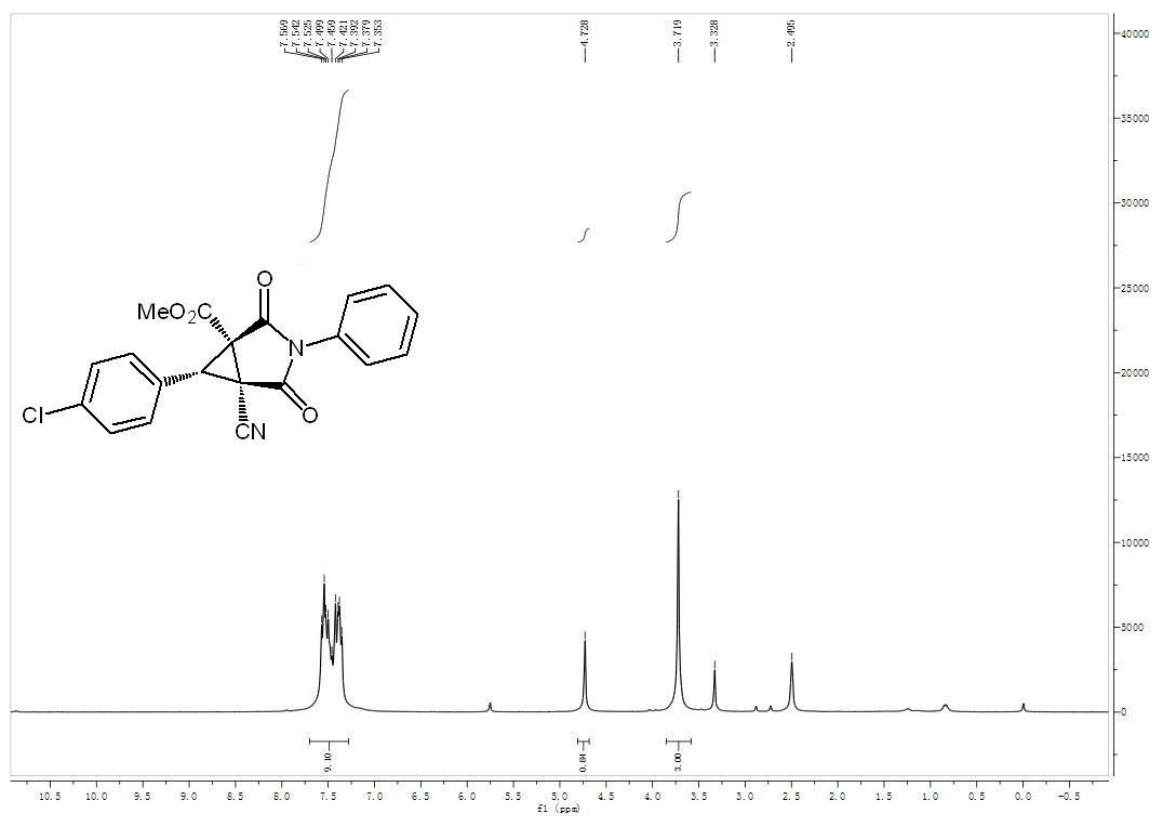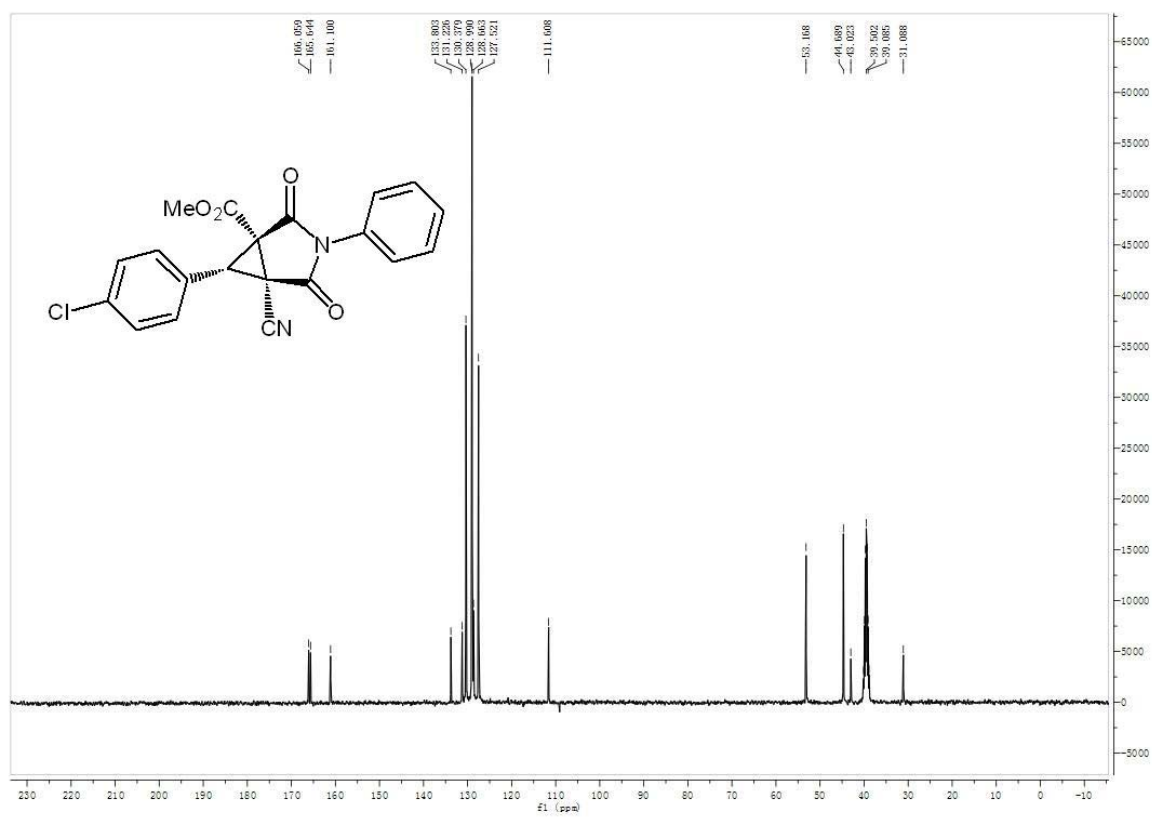

4nc

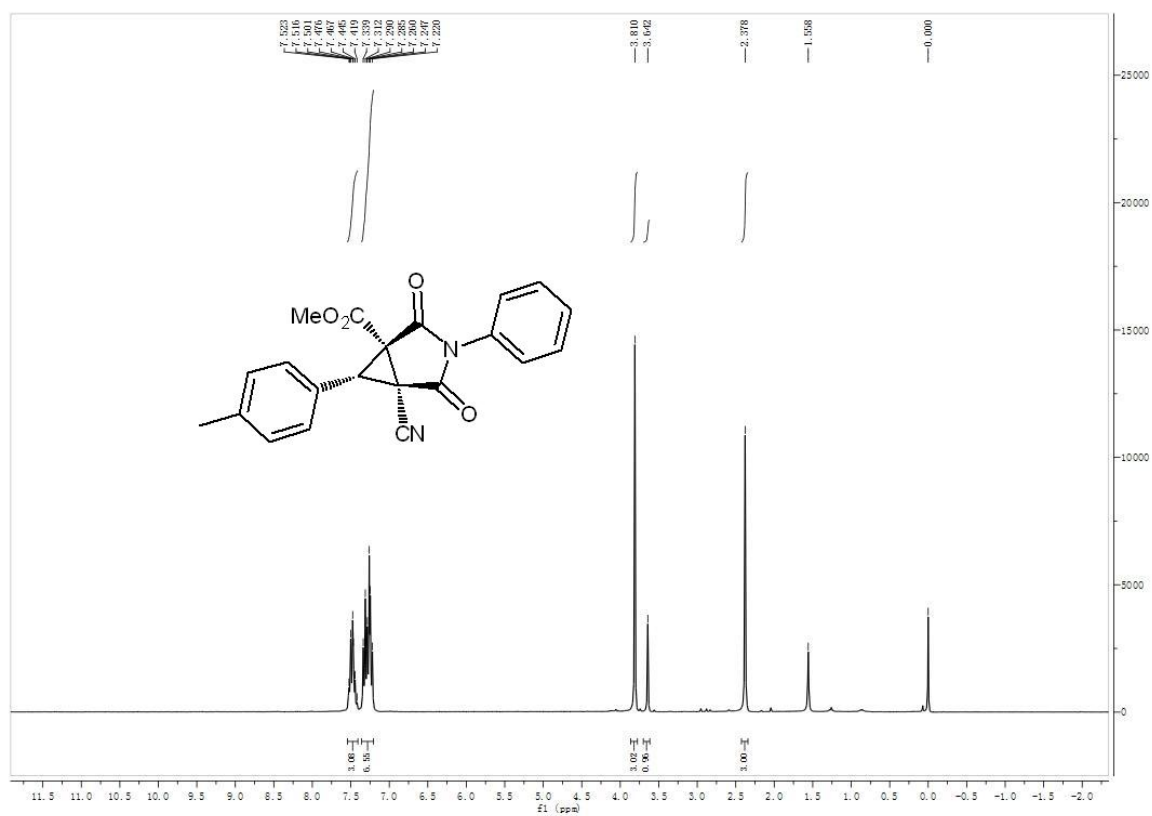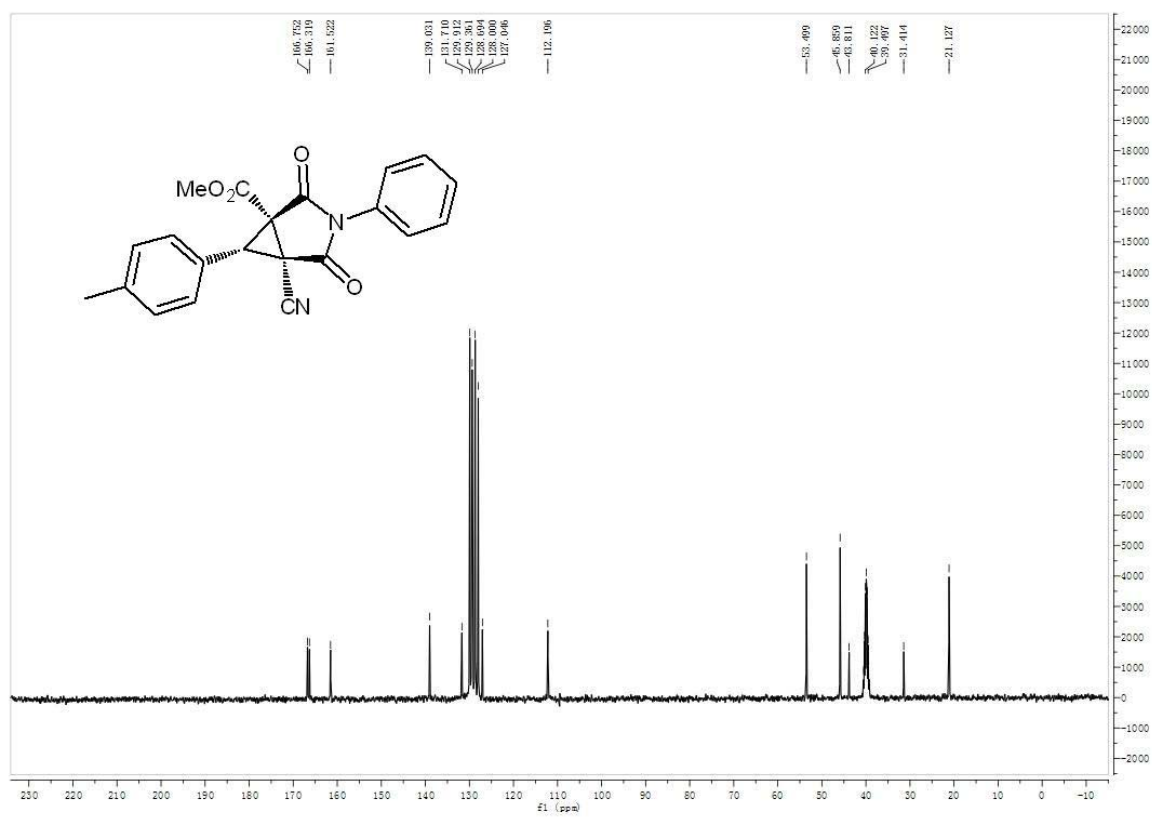

4oc

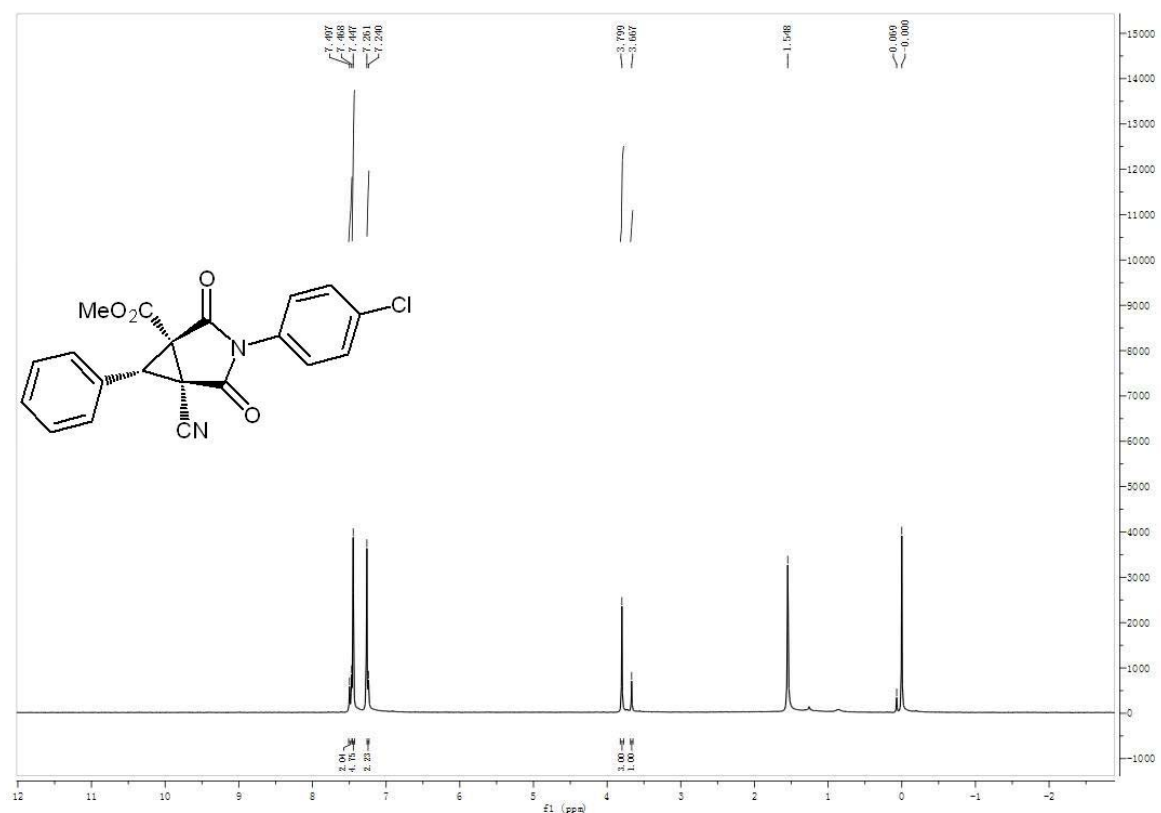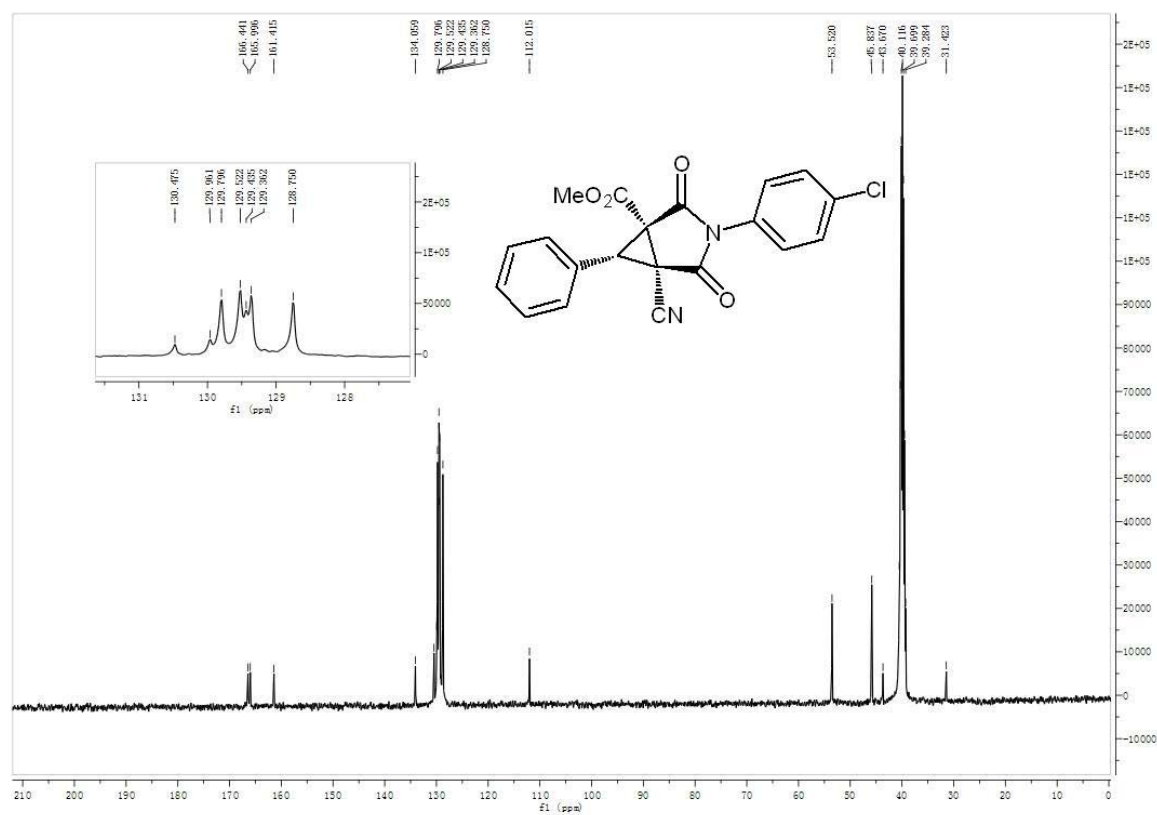

Chemical structure: CC1=CC=C(C=C1)N2C(=O)[C@H](C#N)[C@@H](C(=O)OC)[C@H]2C3=CC=CC=C3

<sup>1</sup>H NMR spectrum (CDCl<sub>3</sub>) showing peaks at the following chemical shifts (ppm): 7.437, 7.365, 7.277, 7.257, 7.157, 7.139, 3.788, 3.666, 2.396, 1.561, and 0.000. Integration values are provided below the baseline: 4.91, 1.96, 2.01, 3.01, 0.93, 3.00, and 0.00.

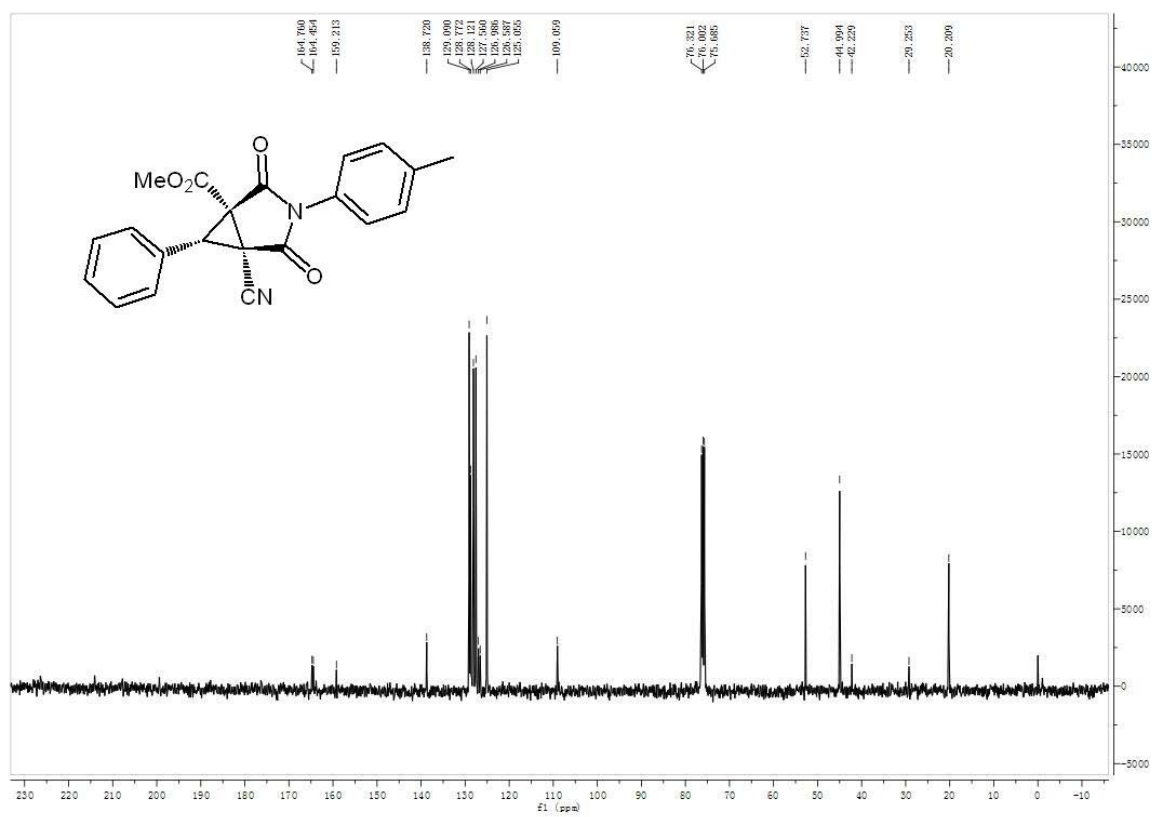

4qc

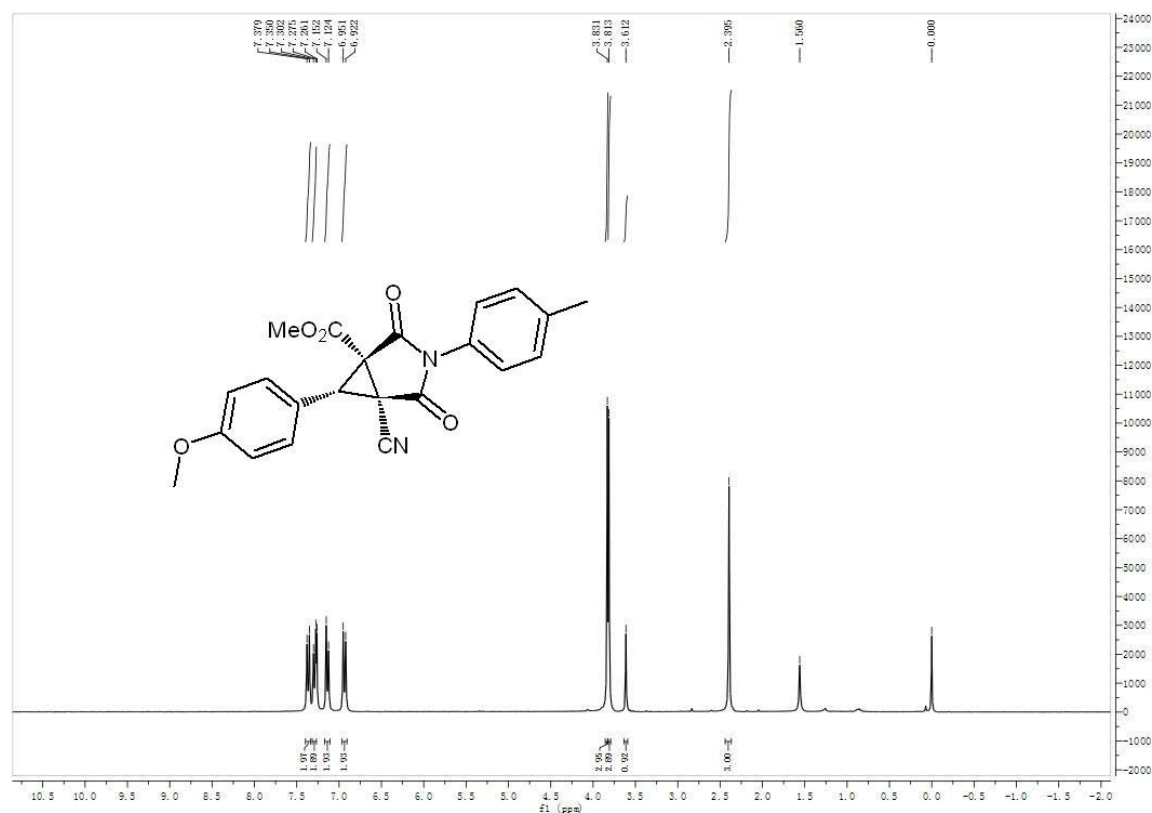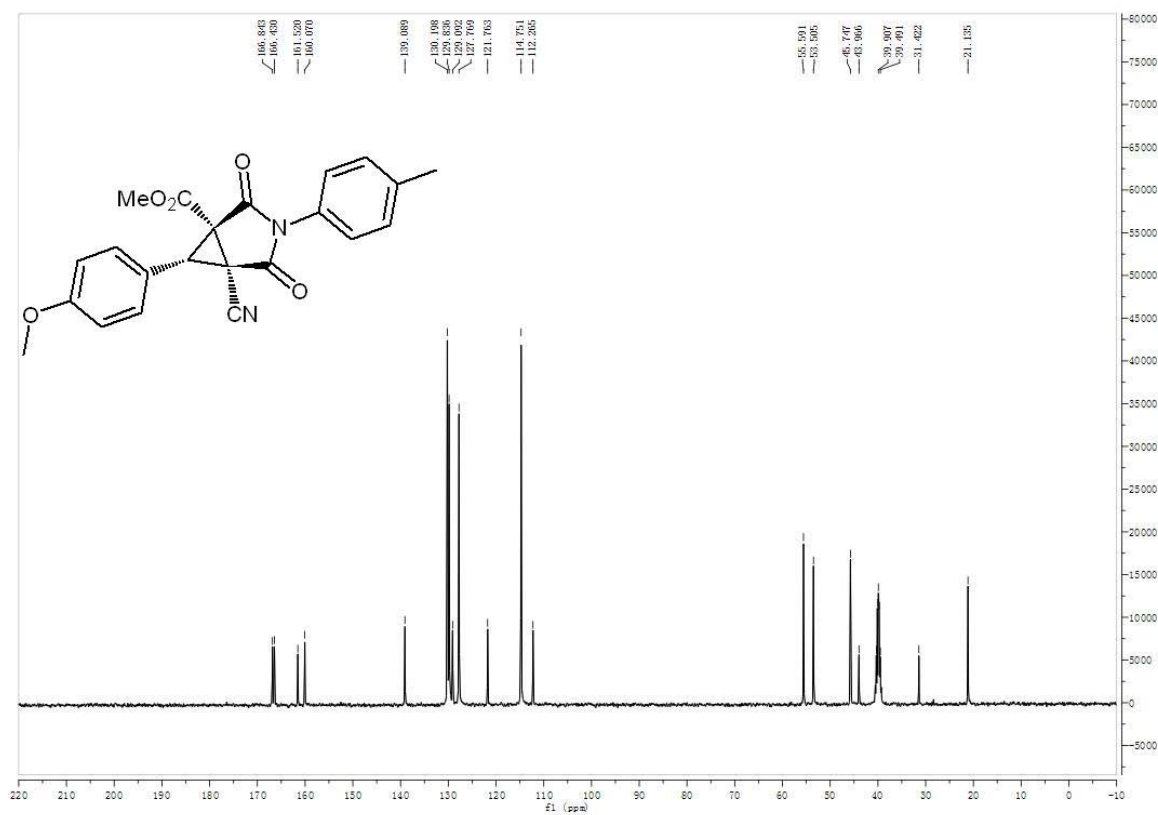

5lc

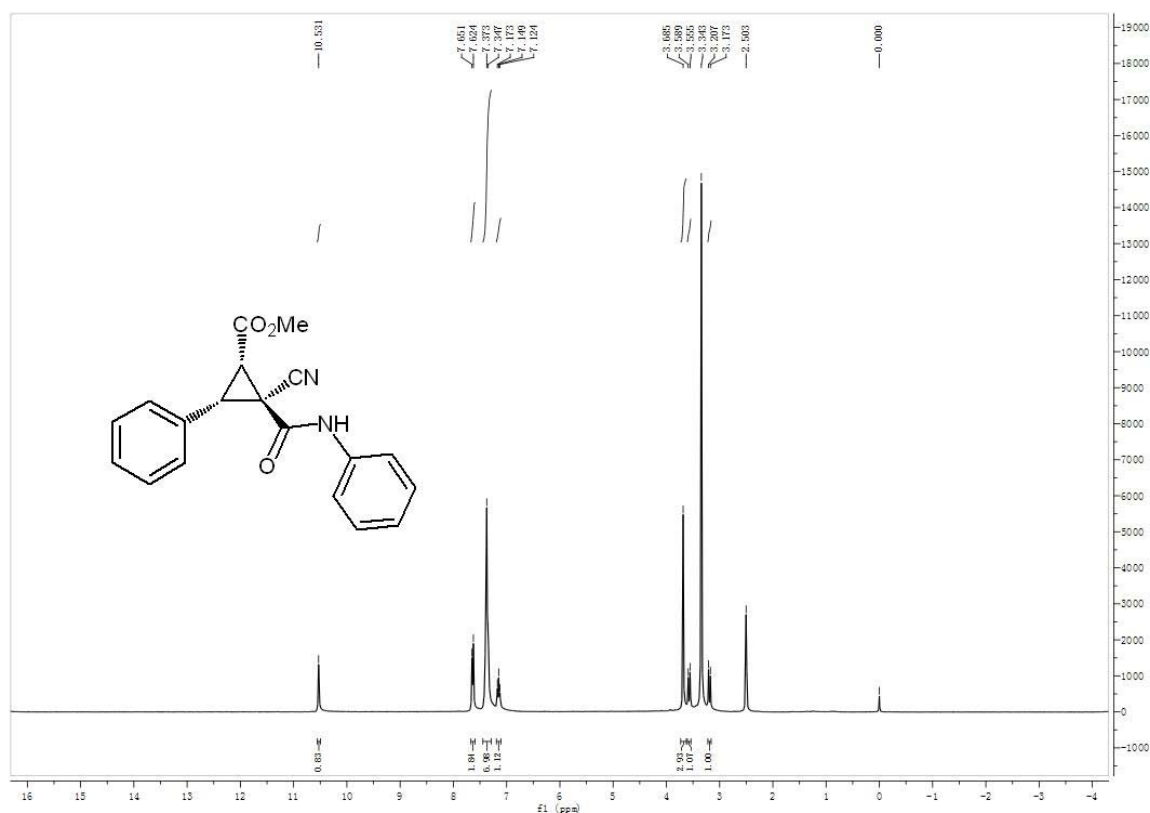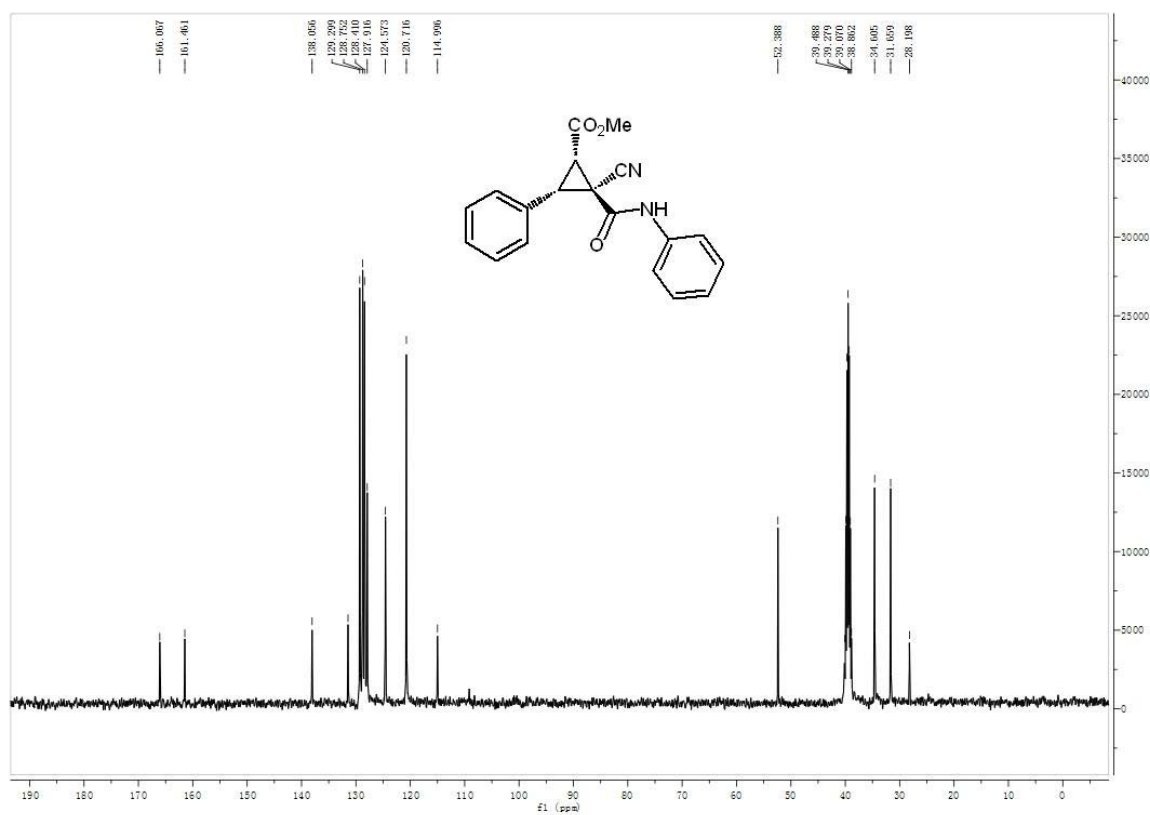

5nc

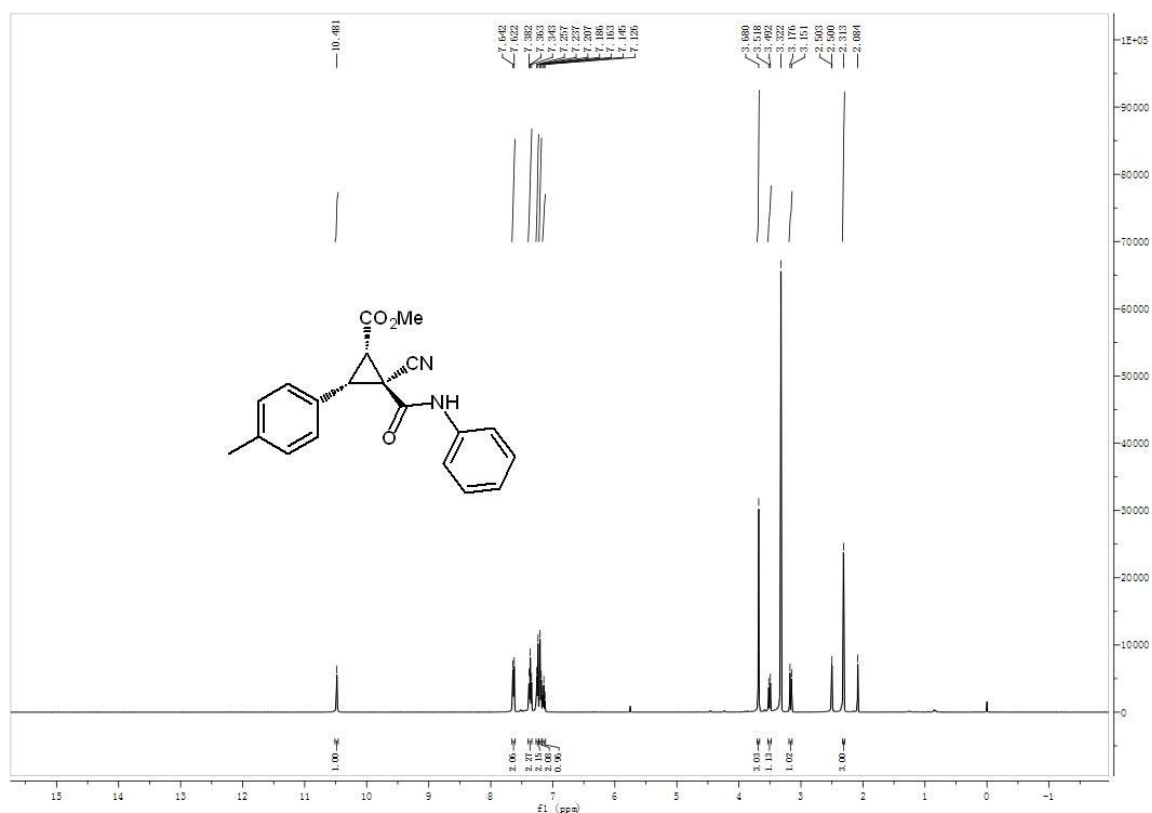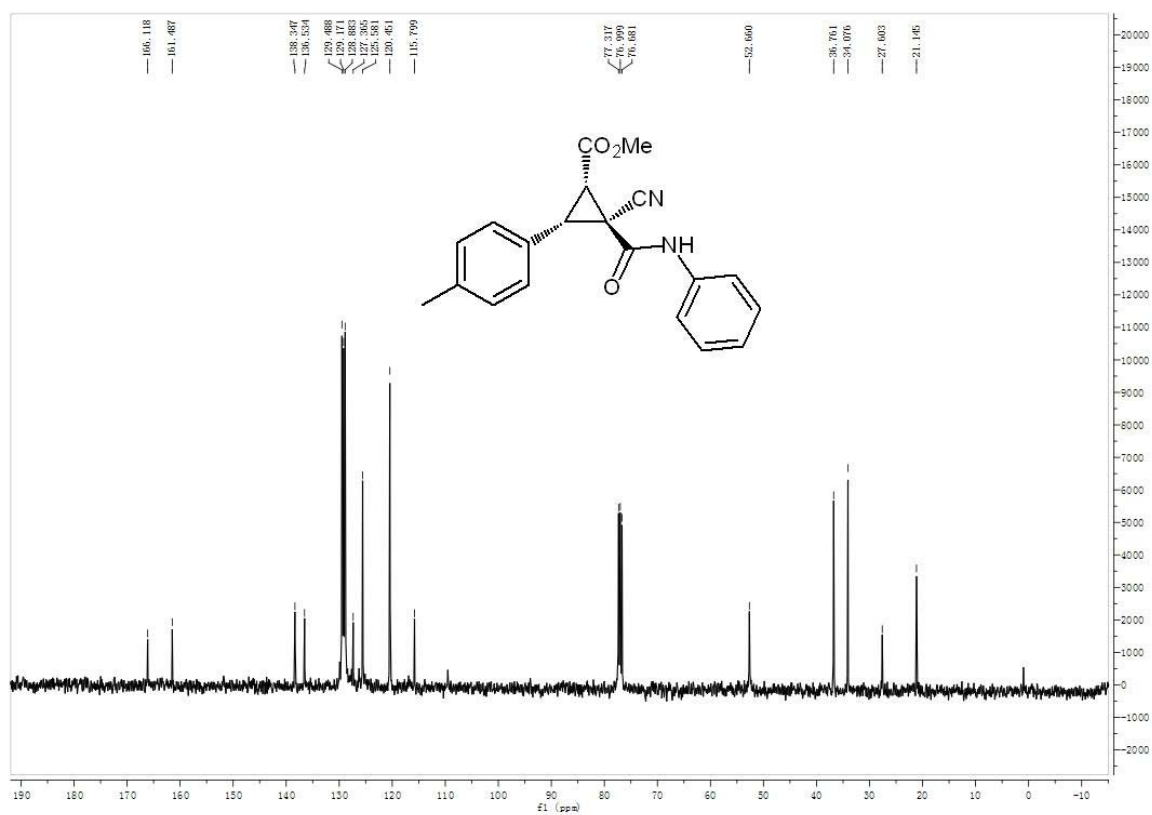



5oc

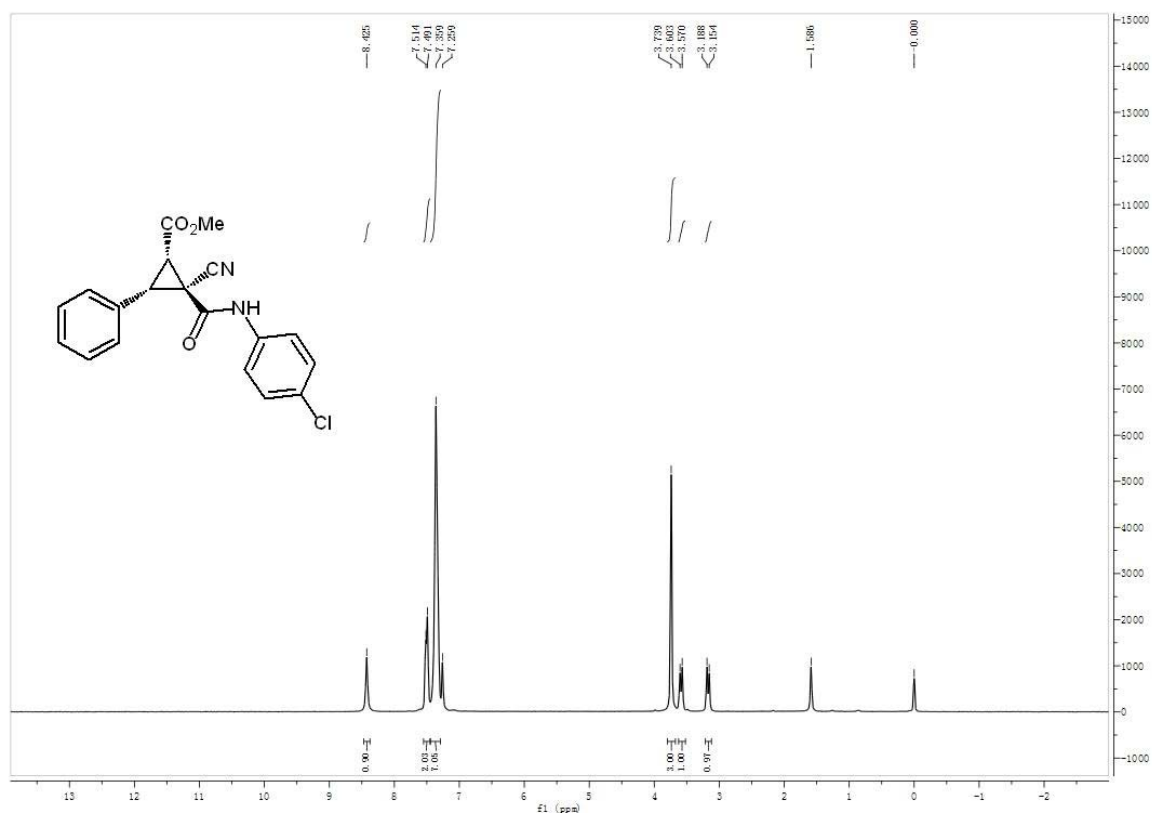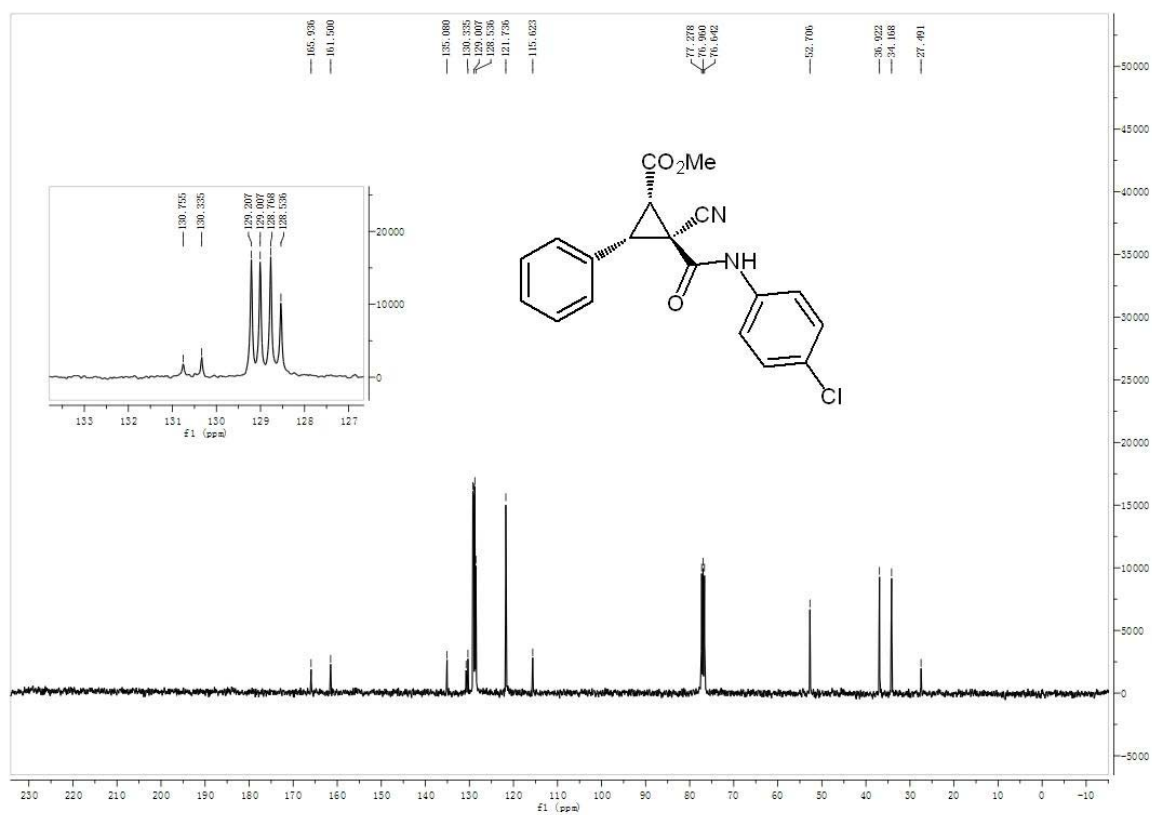

51b

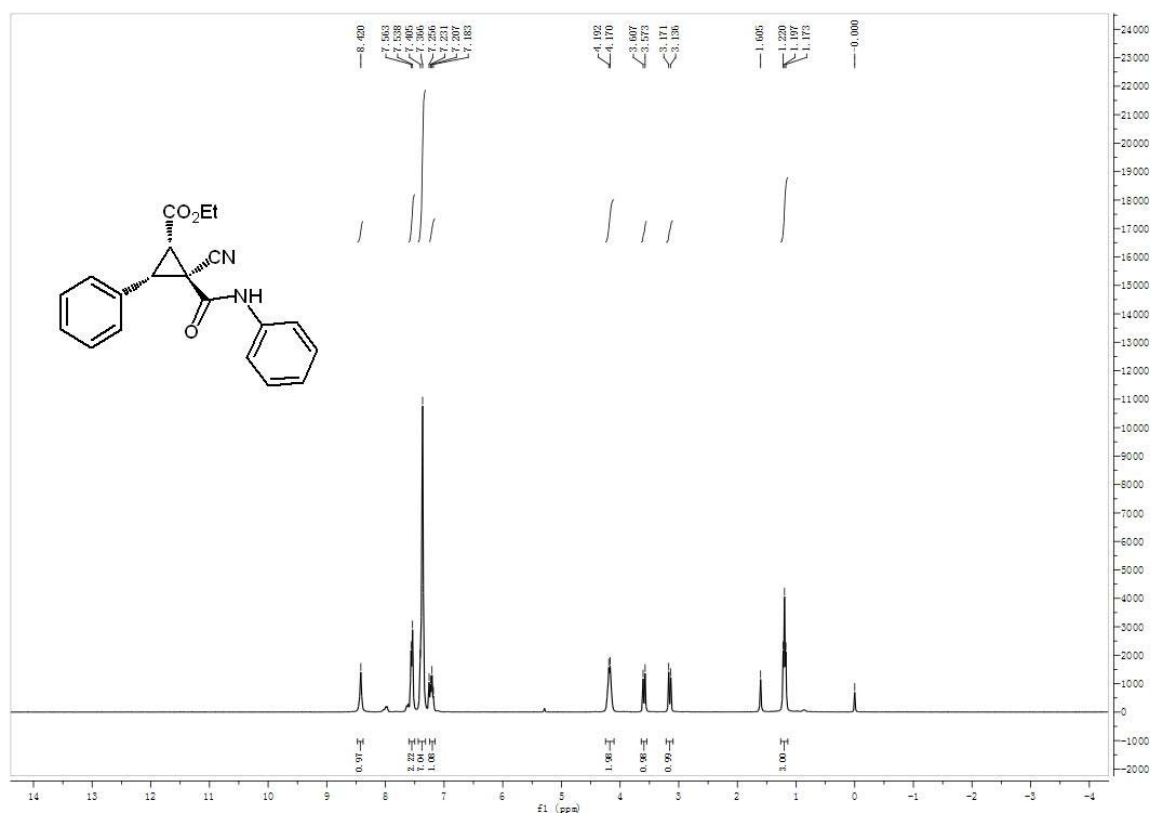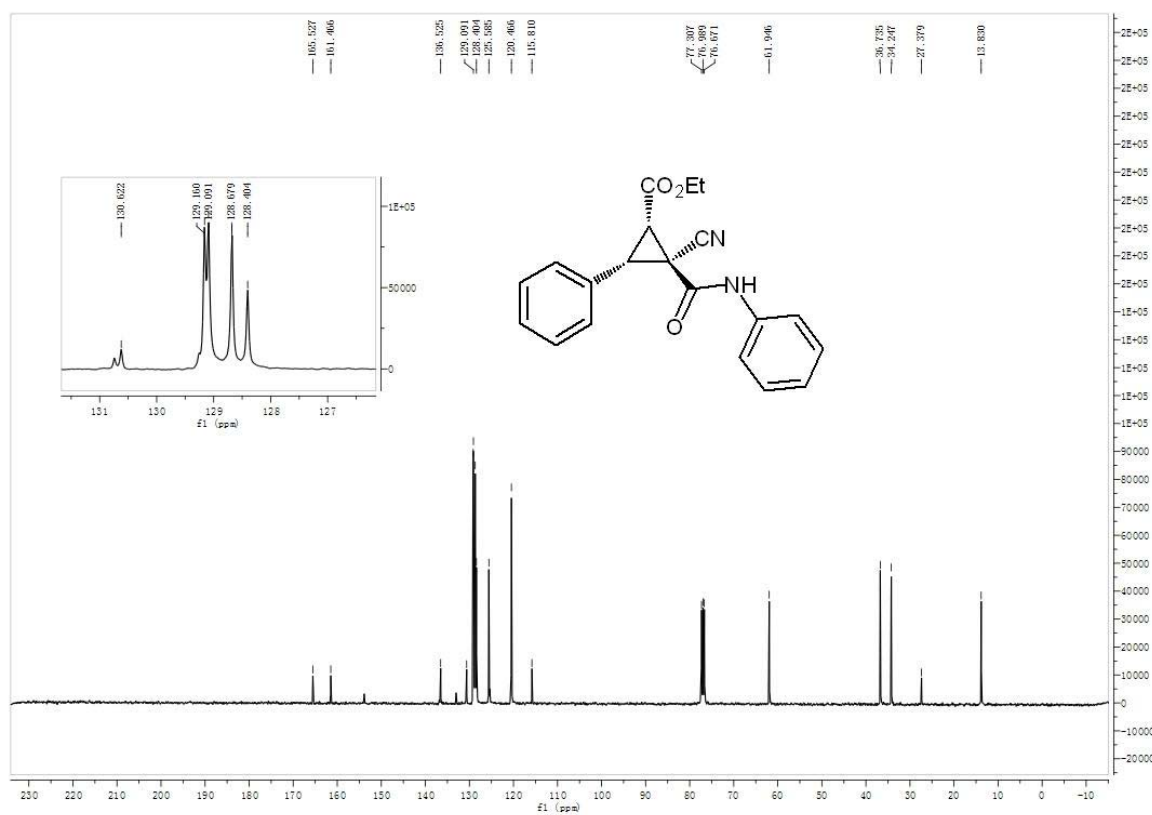

5mb

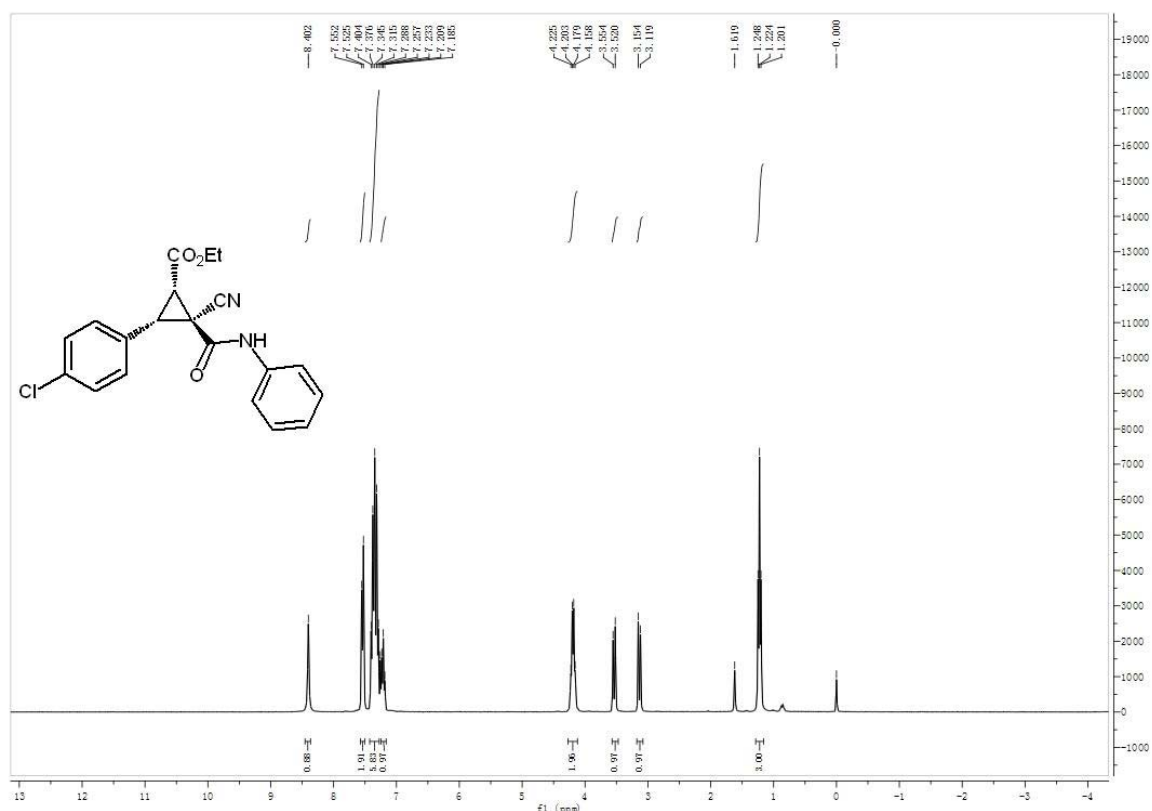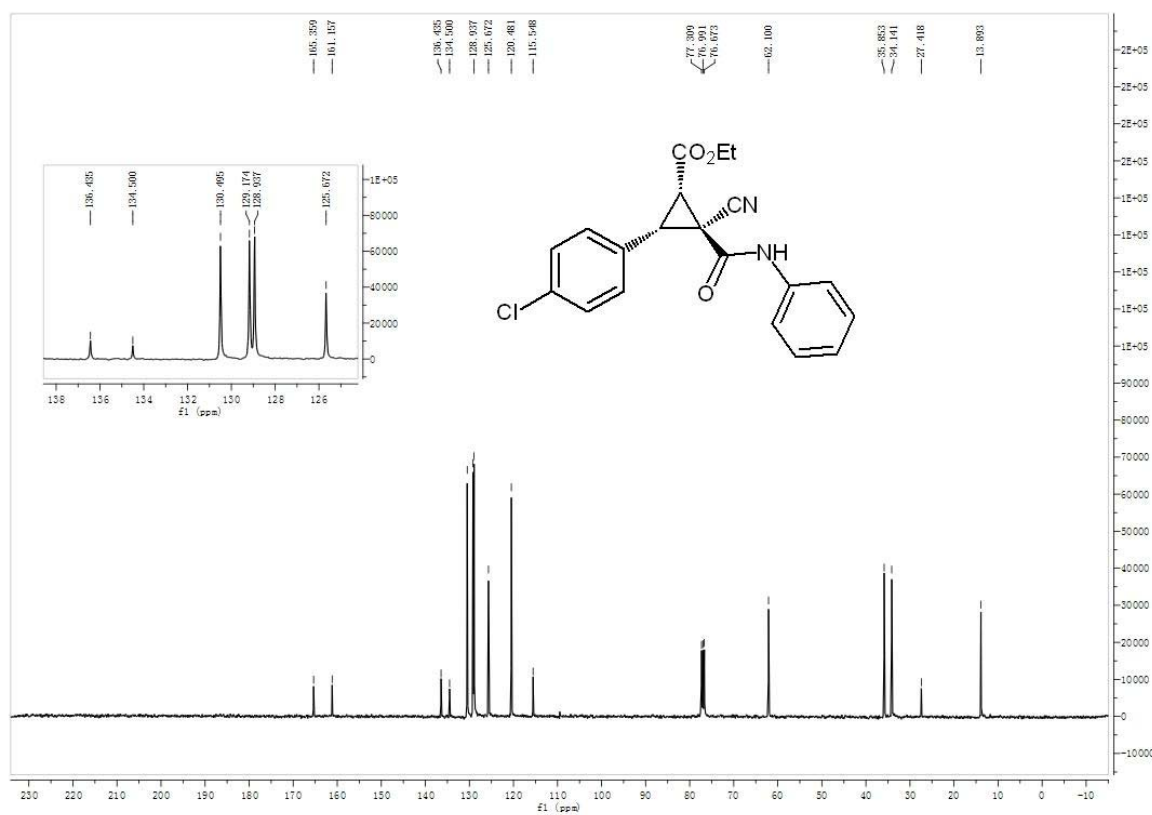

6mc

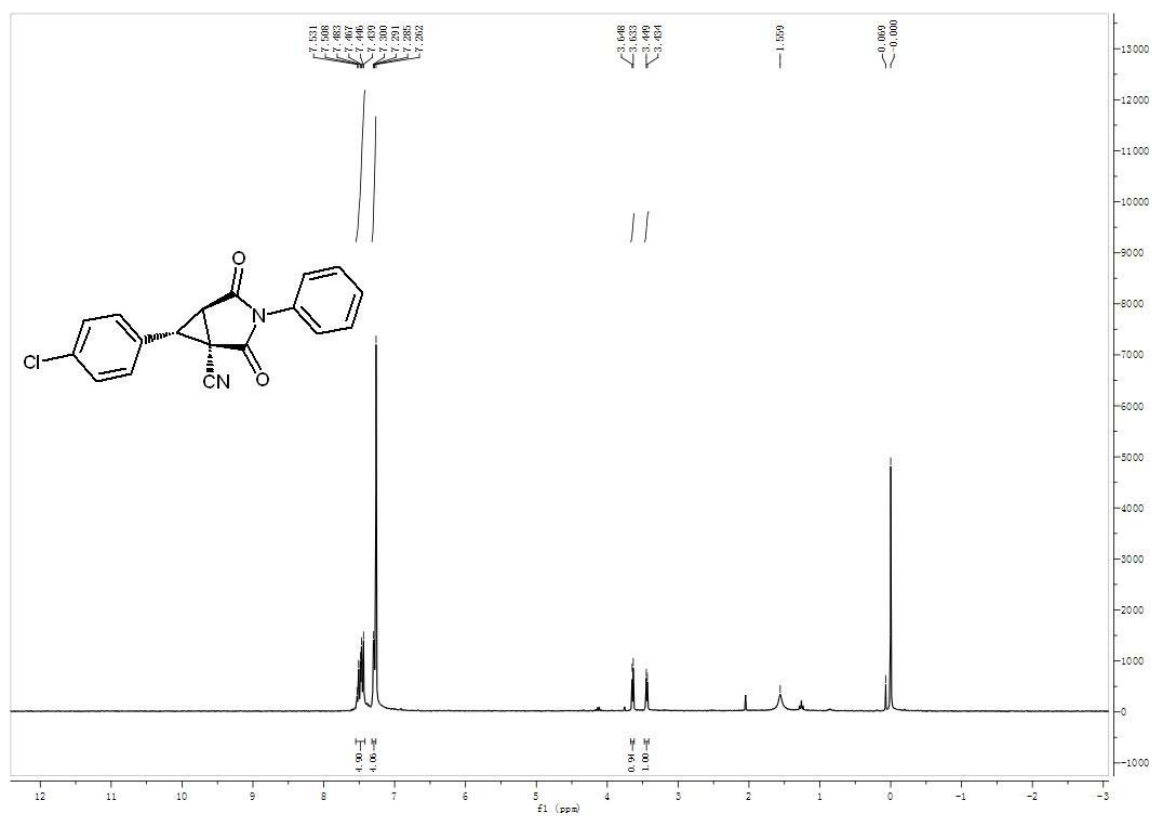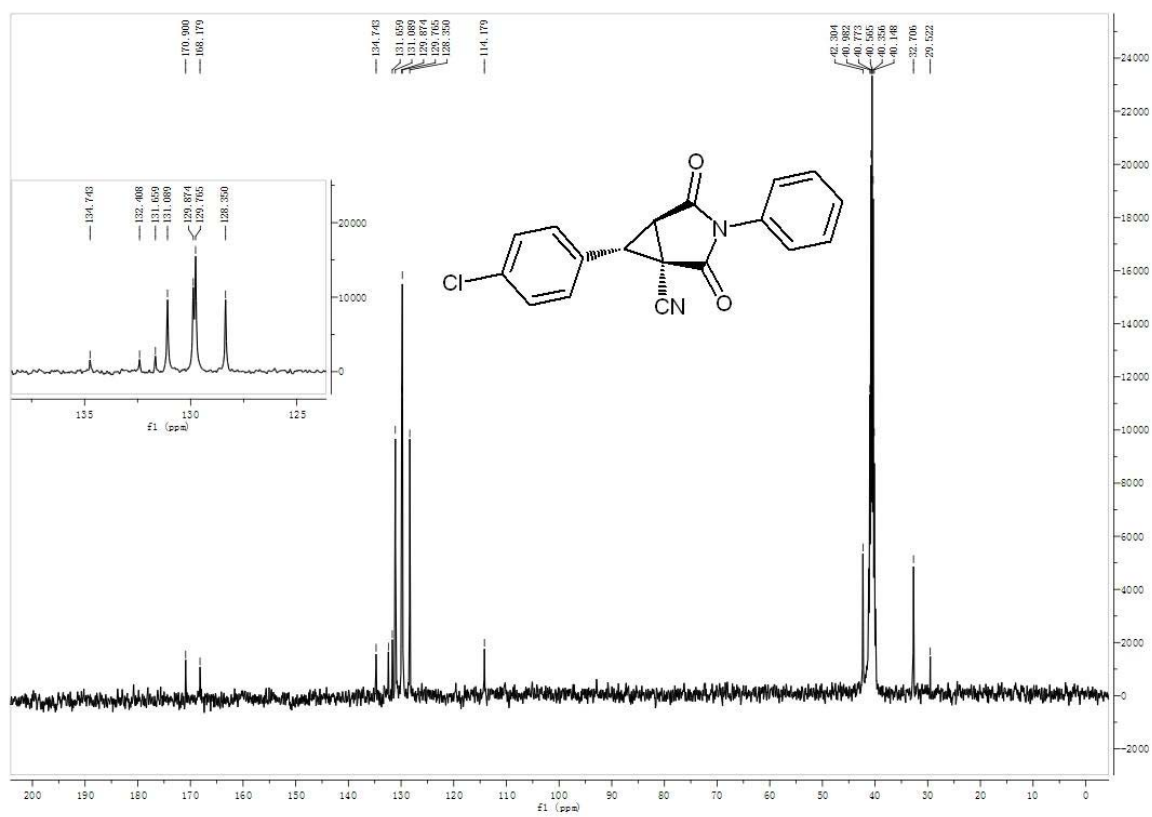

6pc

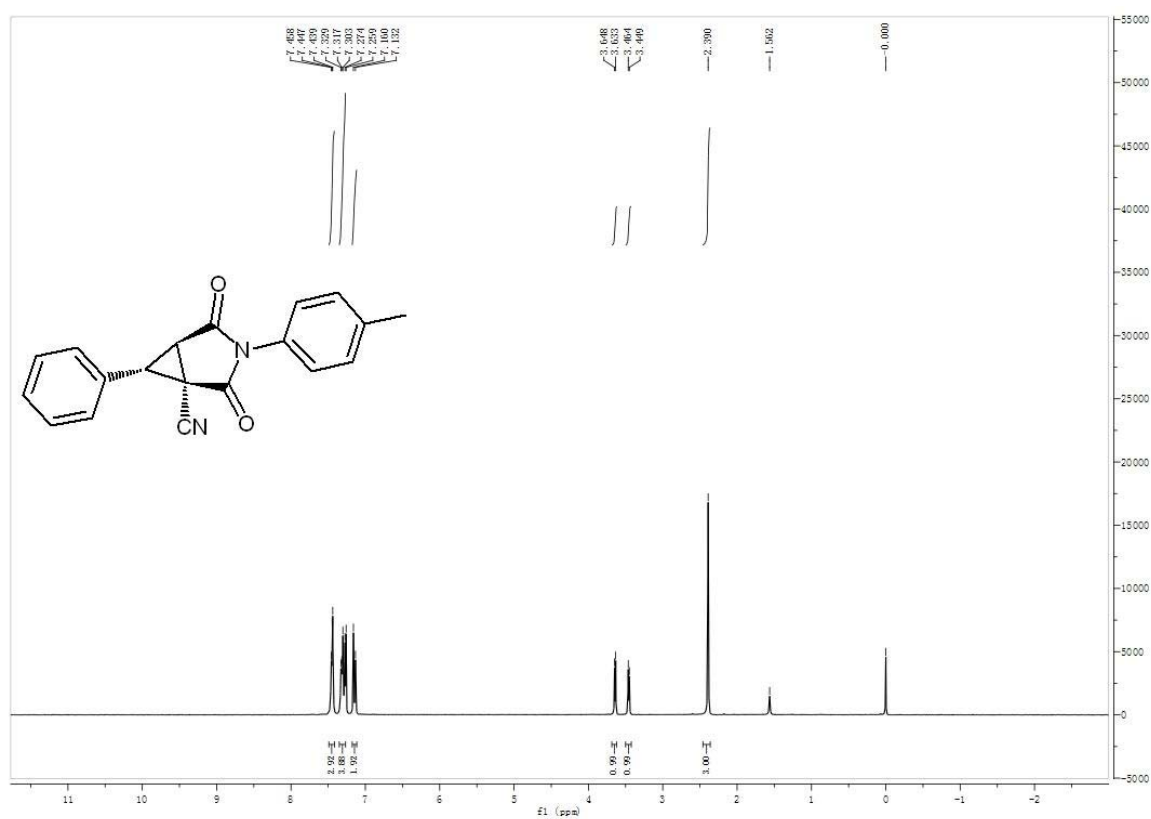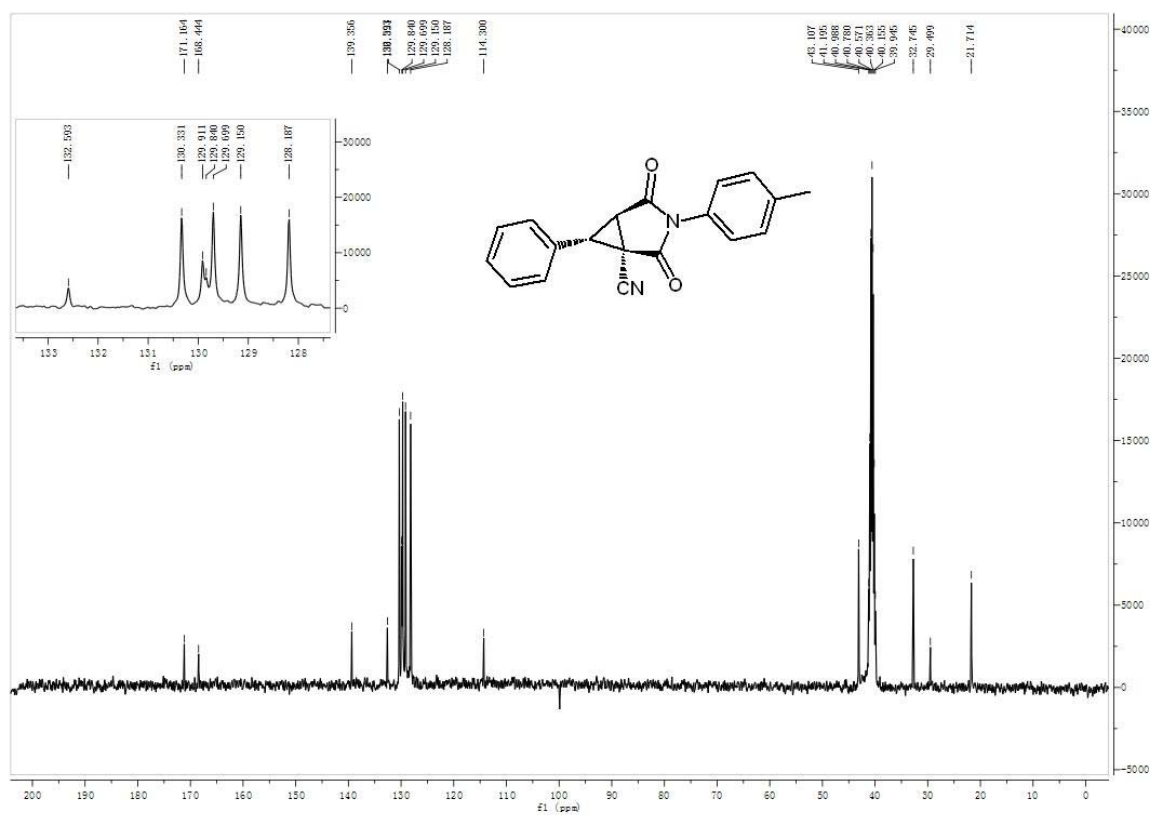

7lc

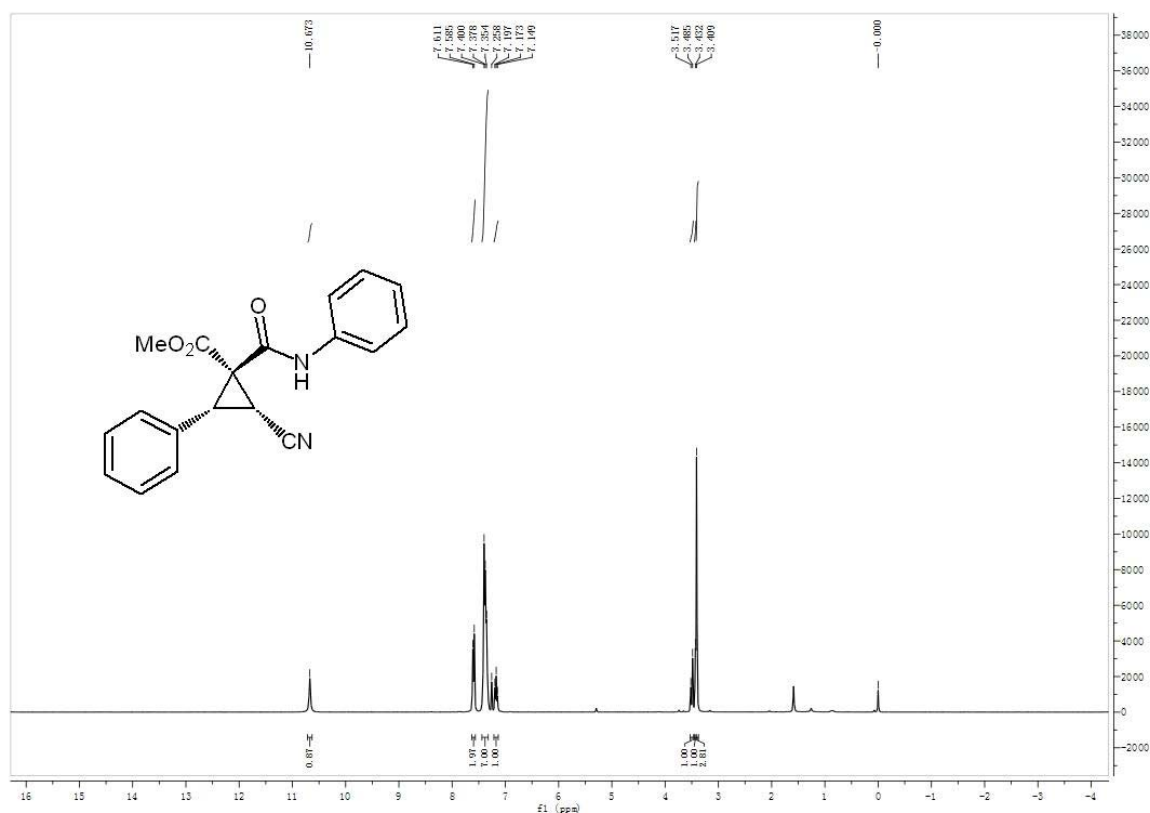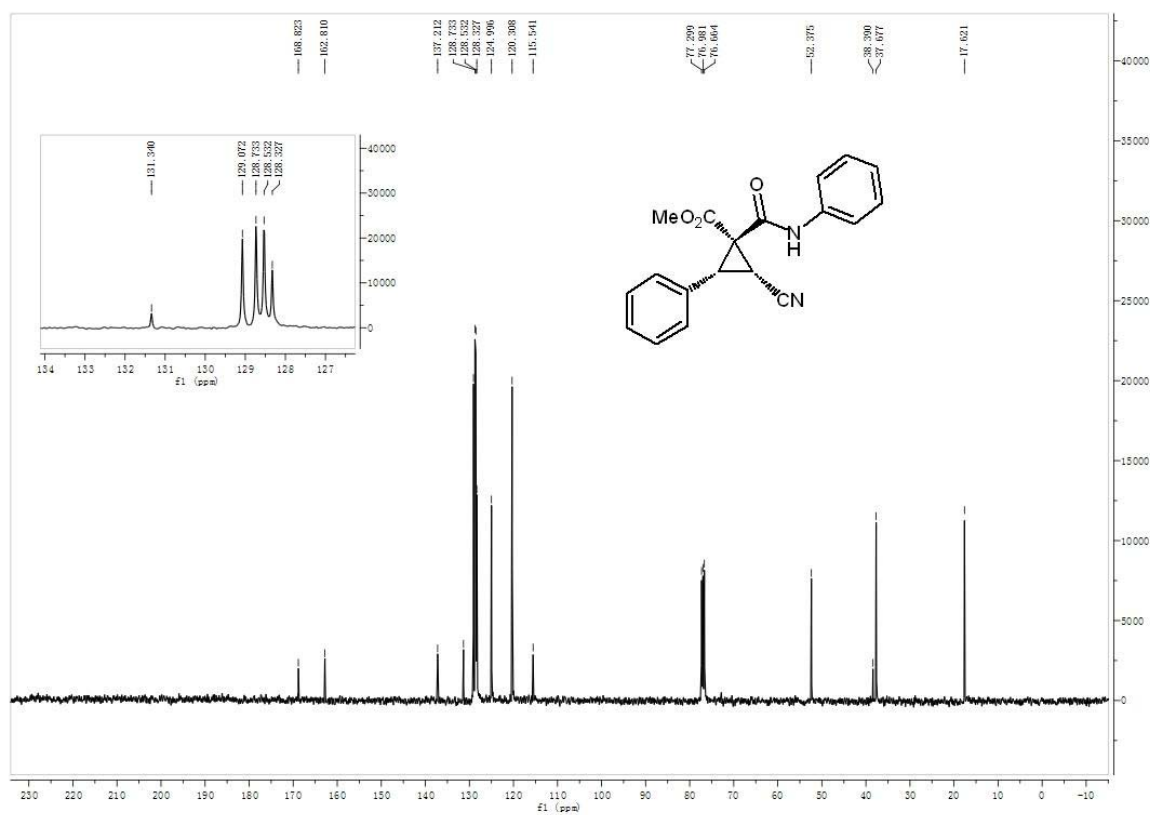

7mc

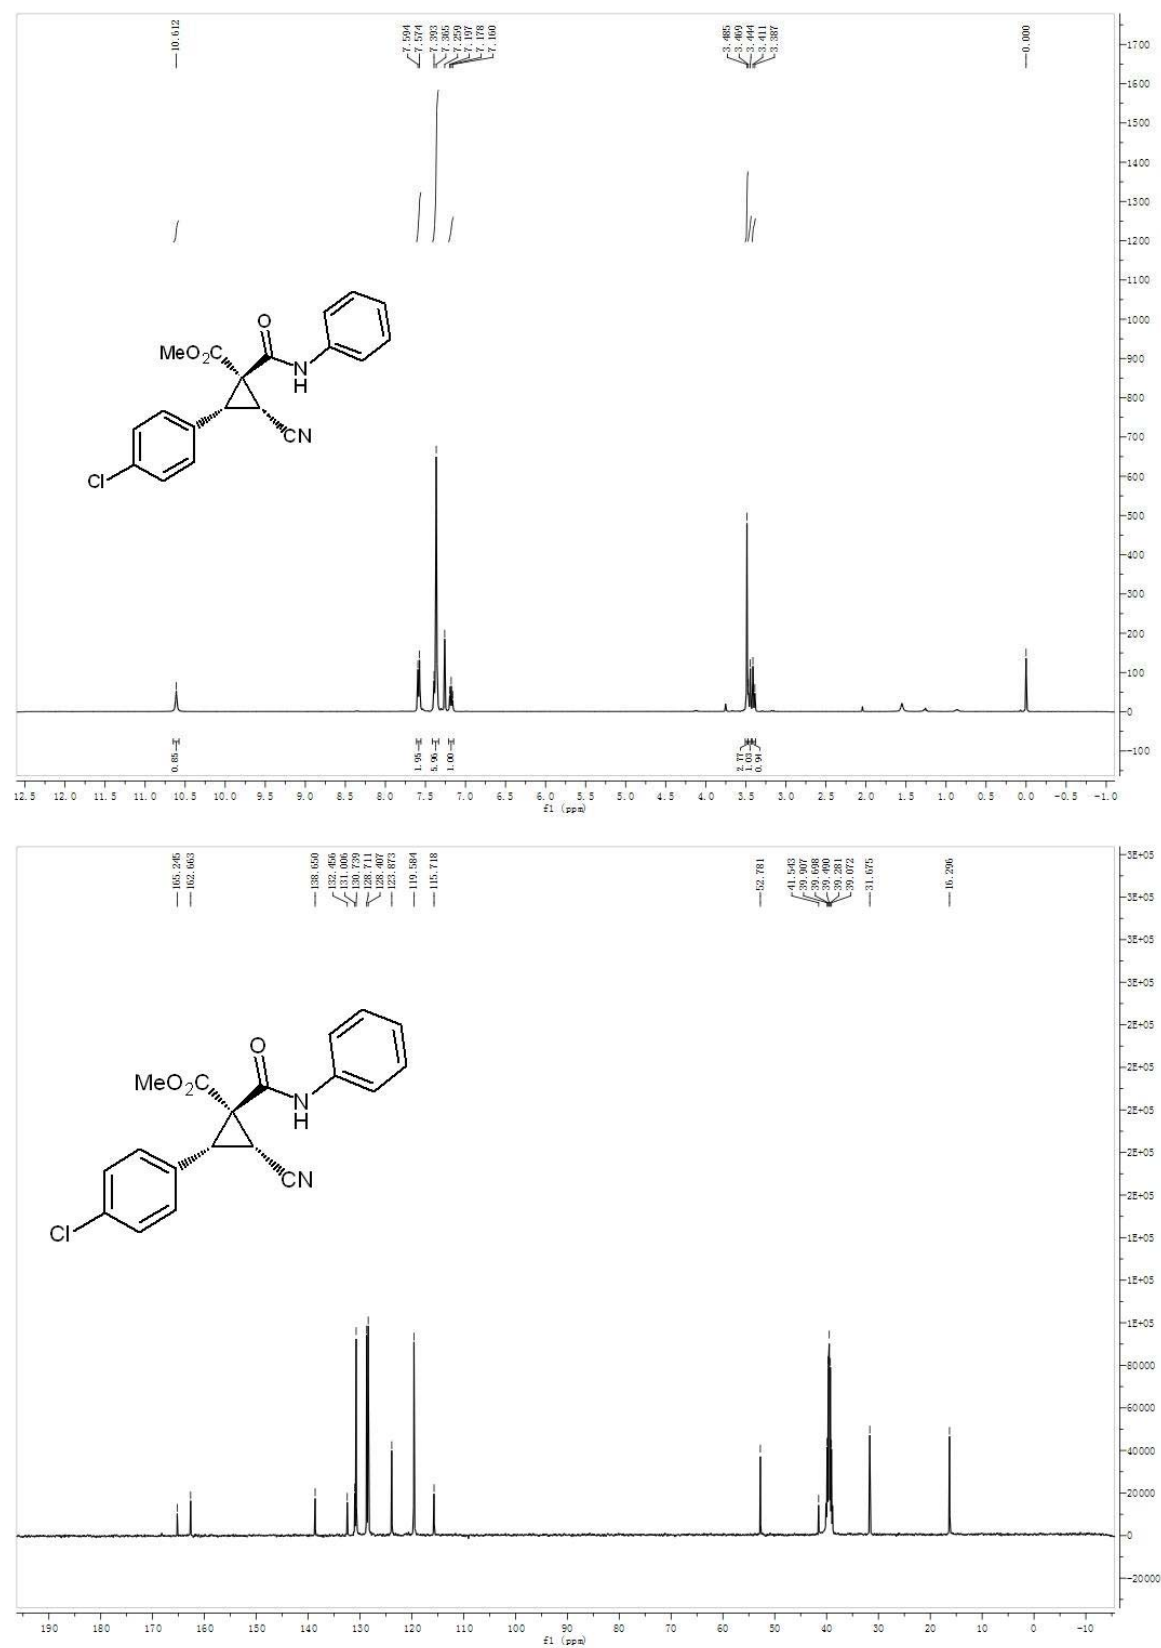

Supplement: c4ob00087k1.pdf [file c4ob00087k1.pdf]
